# Supplementary material
Source: publisher figshare collection journal article supplement (https://acs.figshare.com/ndownloader/files/5101444)

## Second Supporting Information

### Asymmetric Alkynylation of Aldehydes Catalyzed by a In(III)/BINOL Complex

Ryo Takita, Kenichiro Yakura, Takashi Ohshima,<sup>†</sup> and Masakatsu Shibasaki\*

*Graduate School of Pharmaceutical Sciences, The University of Tokyo, Hongo, Bunkyo-ku, Tokyo 113-0033, Japan*

e-mail: mshibasa@mol.f.u-tokyo.ac.jp

<sup>13</sup>C NMR spectra for all products mentioned in the manuscript are attached.  
For **3eb** and **3ga**, <sup>1</sup>H NMR spectra are also provided here.

---

<sup>†</sup> *Current Address:* Department of Chemistry, Graduate School of Engineering Science, Osaka University, Toyonaka, Osaka 560-8531, Japan

D:\050812\_13C\savedata77.nmfid  
p119-6 cyclohexanecarboxyaldehyde+phenylacetylene

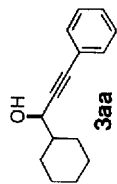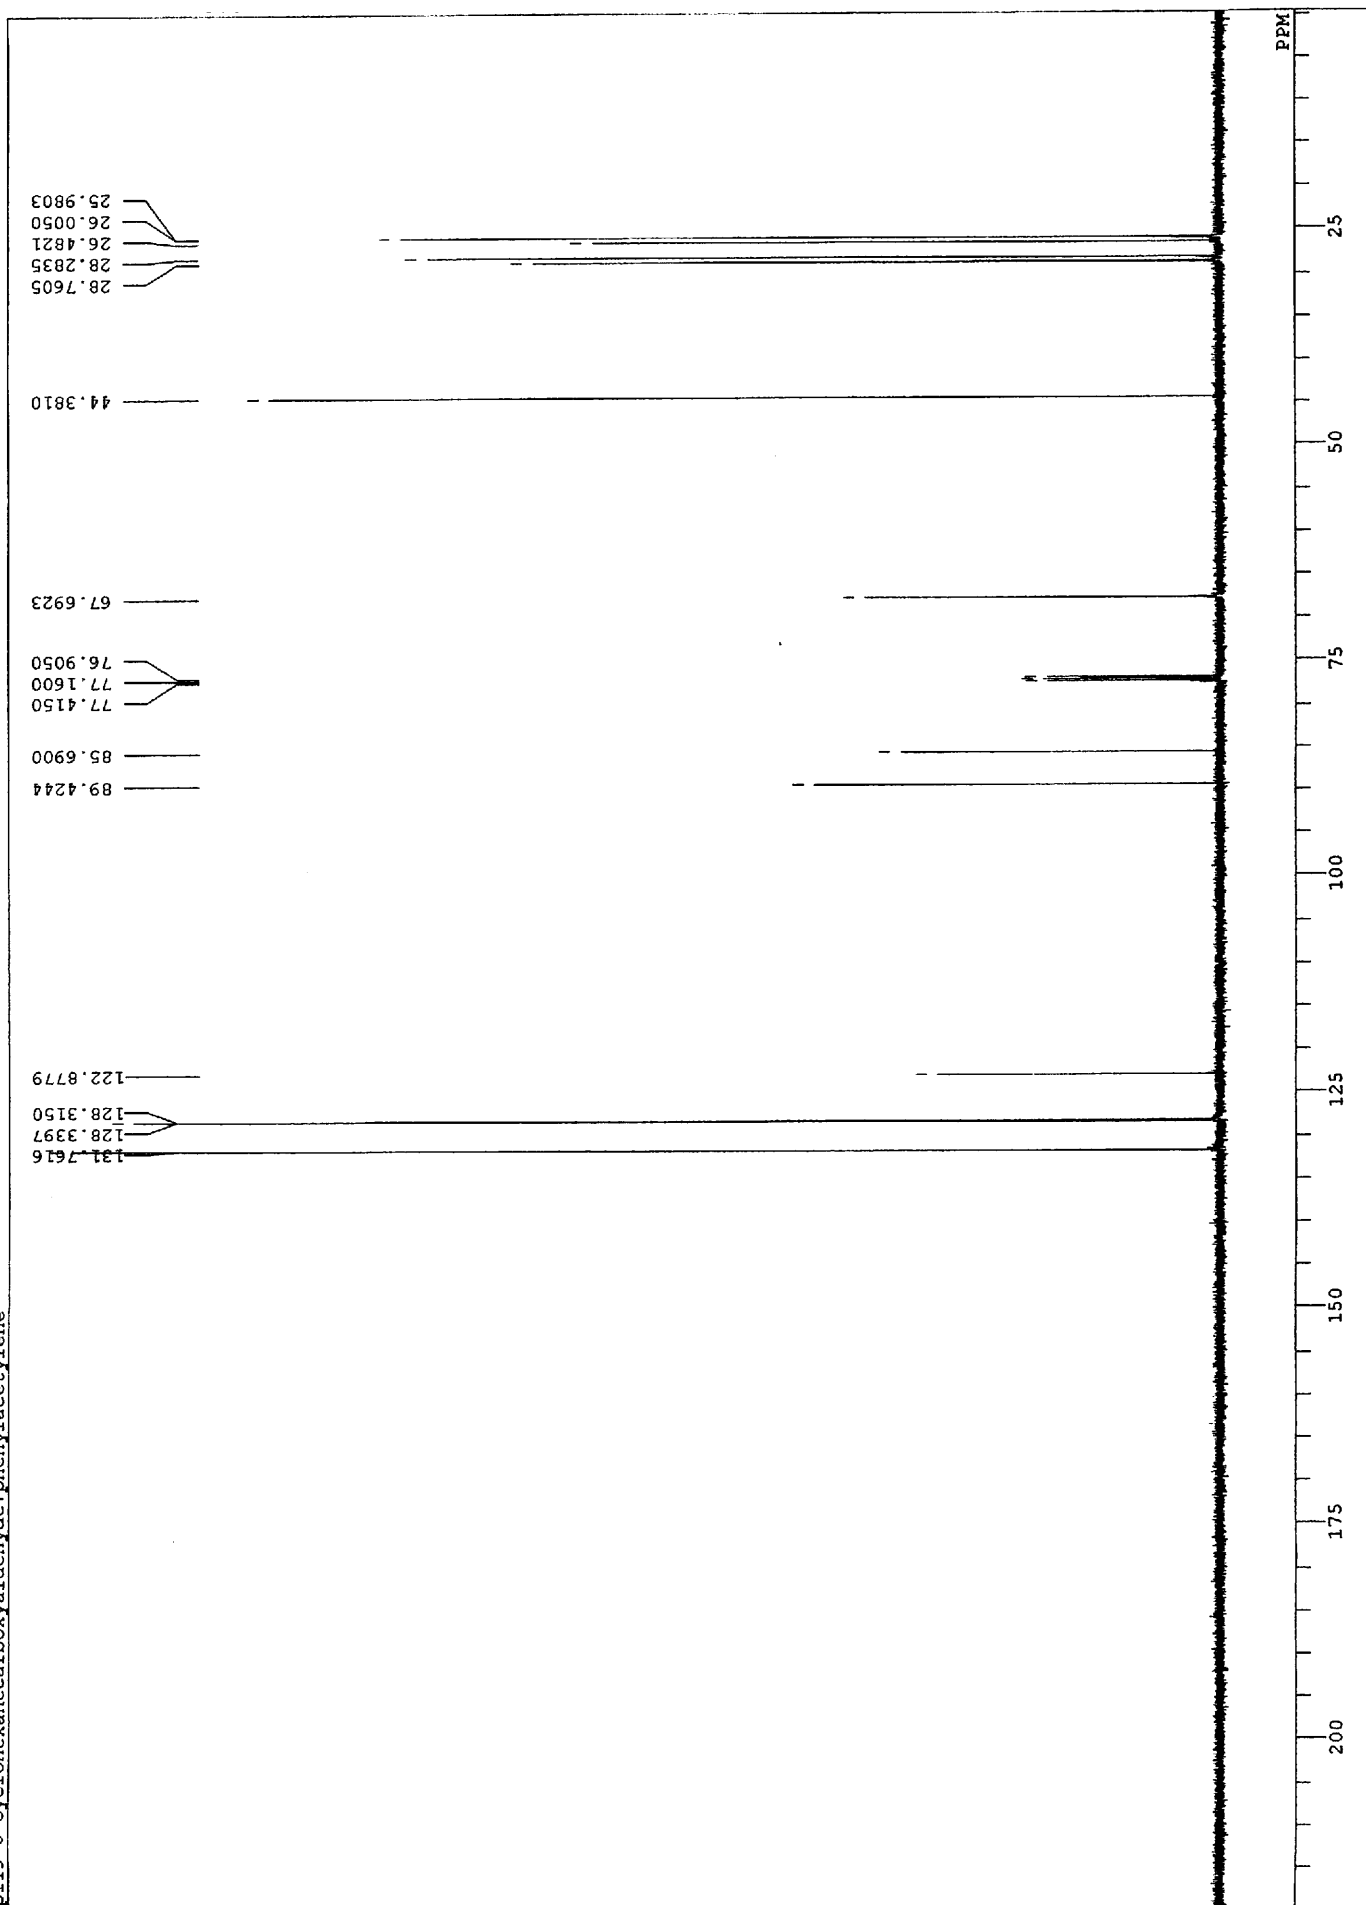

D:\050818\_3\_13C\savedata77.nmfid  
p126\_cyclohexanecarboxyaldehyde+4-Ph-1-butyne

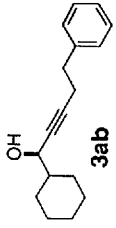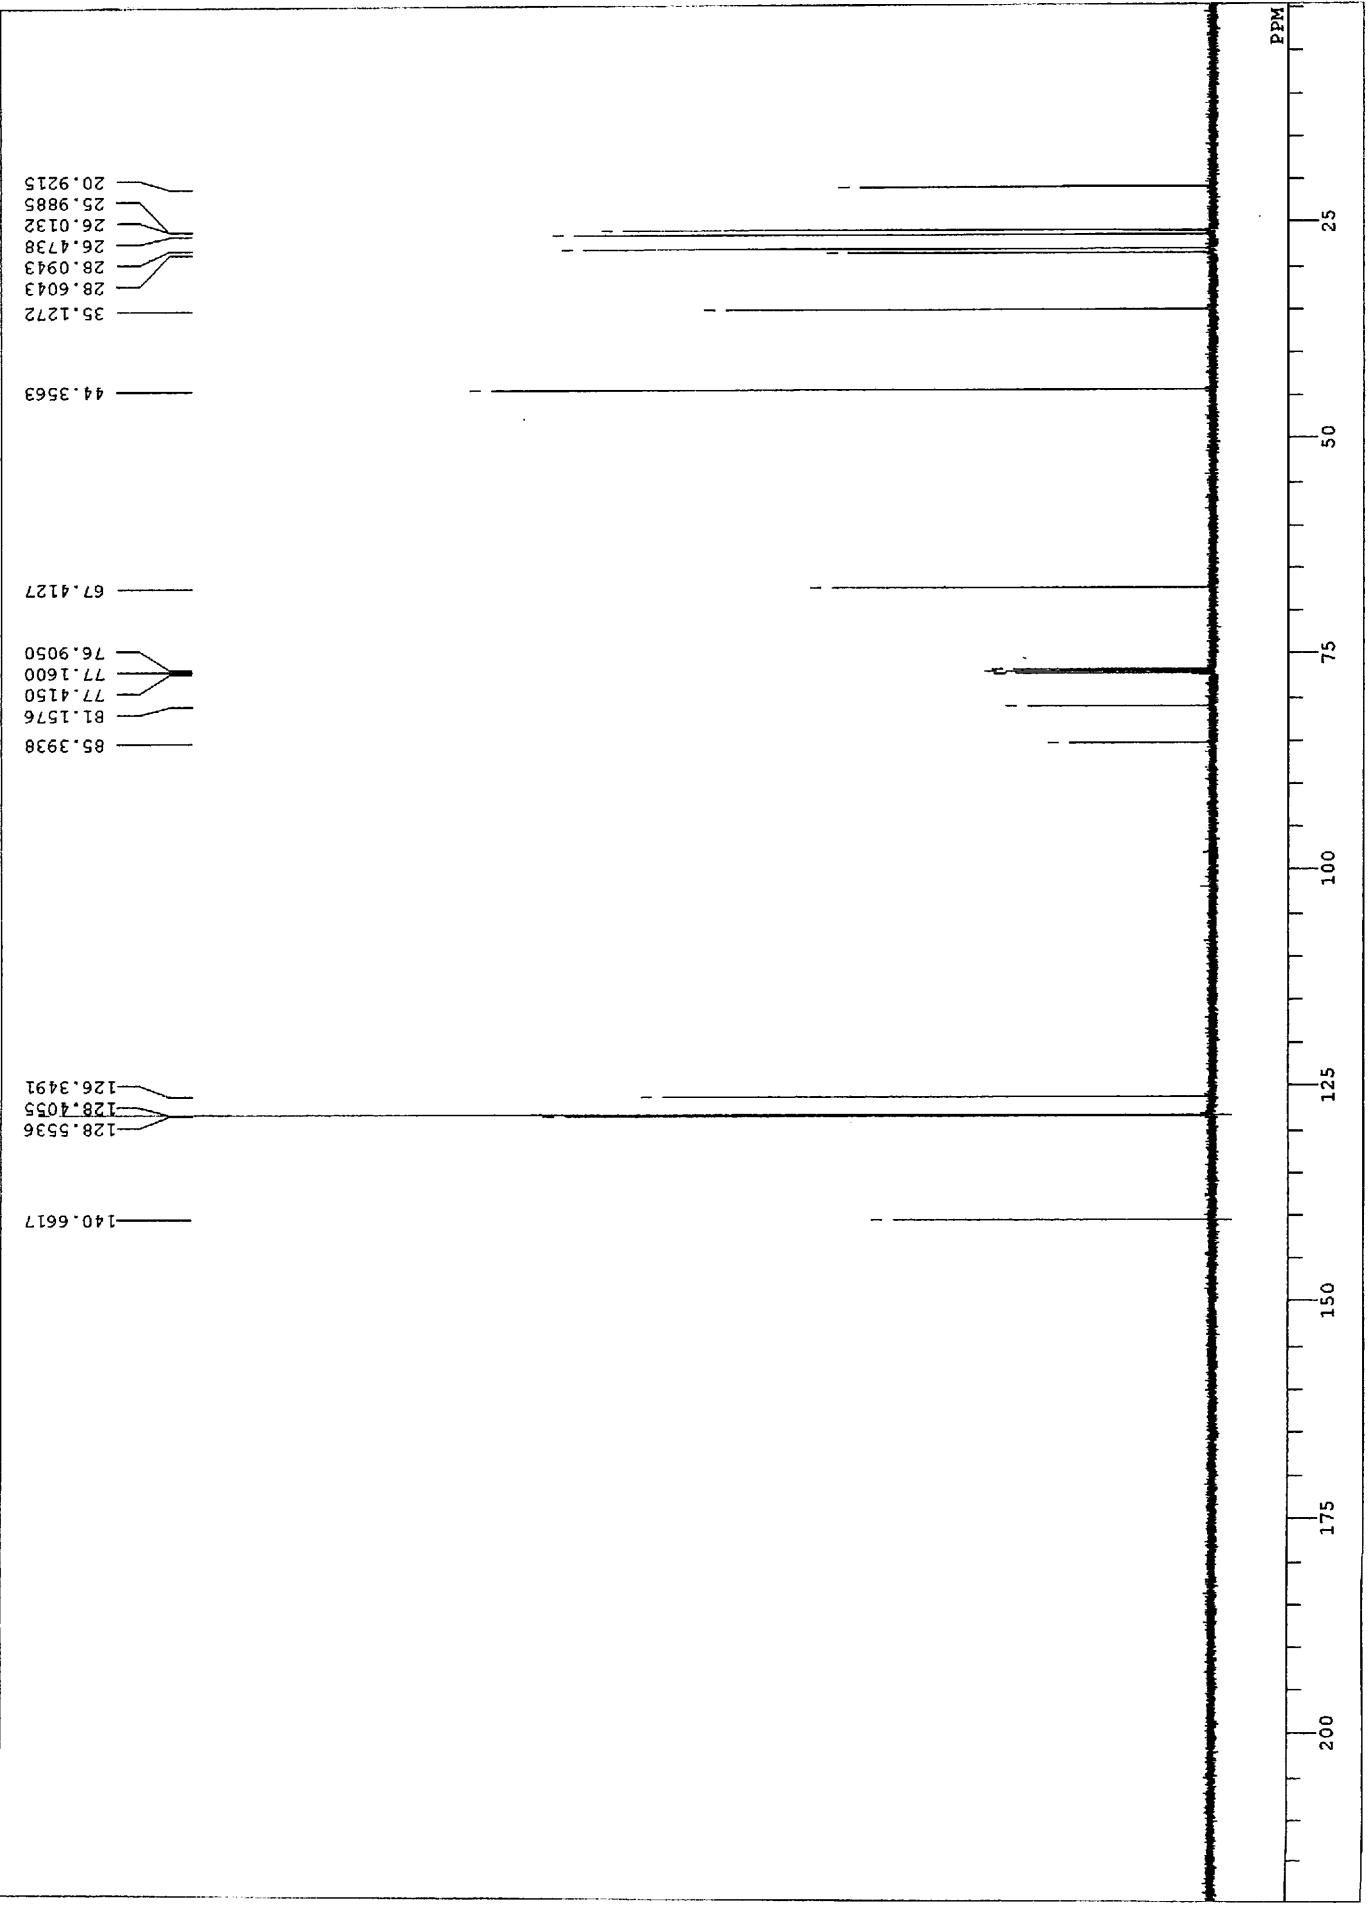

D:\050818\_4\_13C\save\data77.nm.fid  
p130\_isodecylaldehyde+phenylacetylene

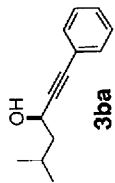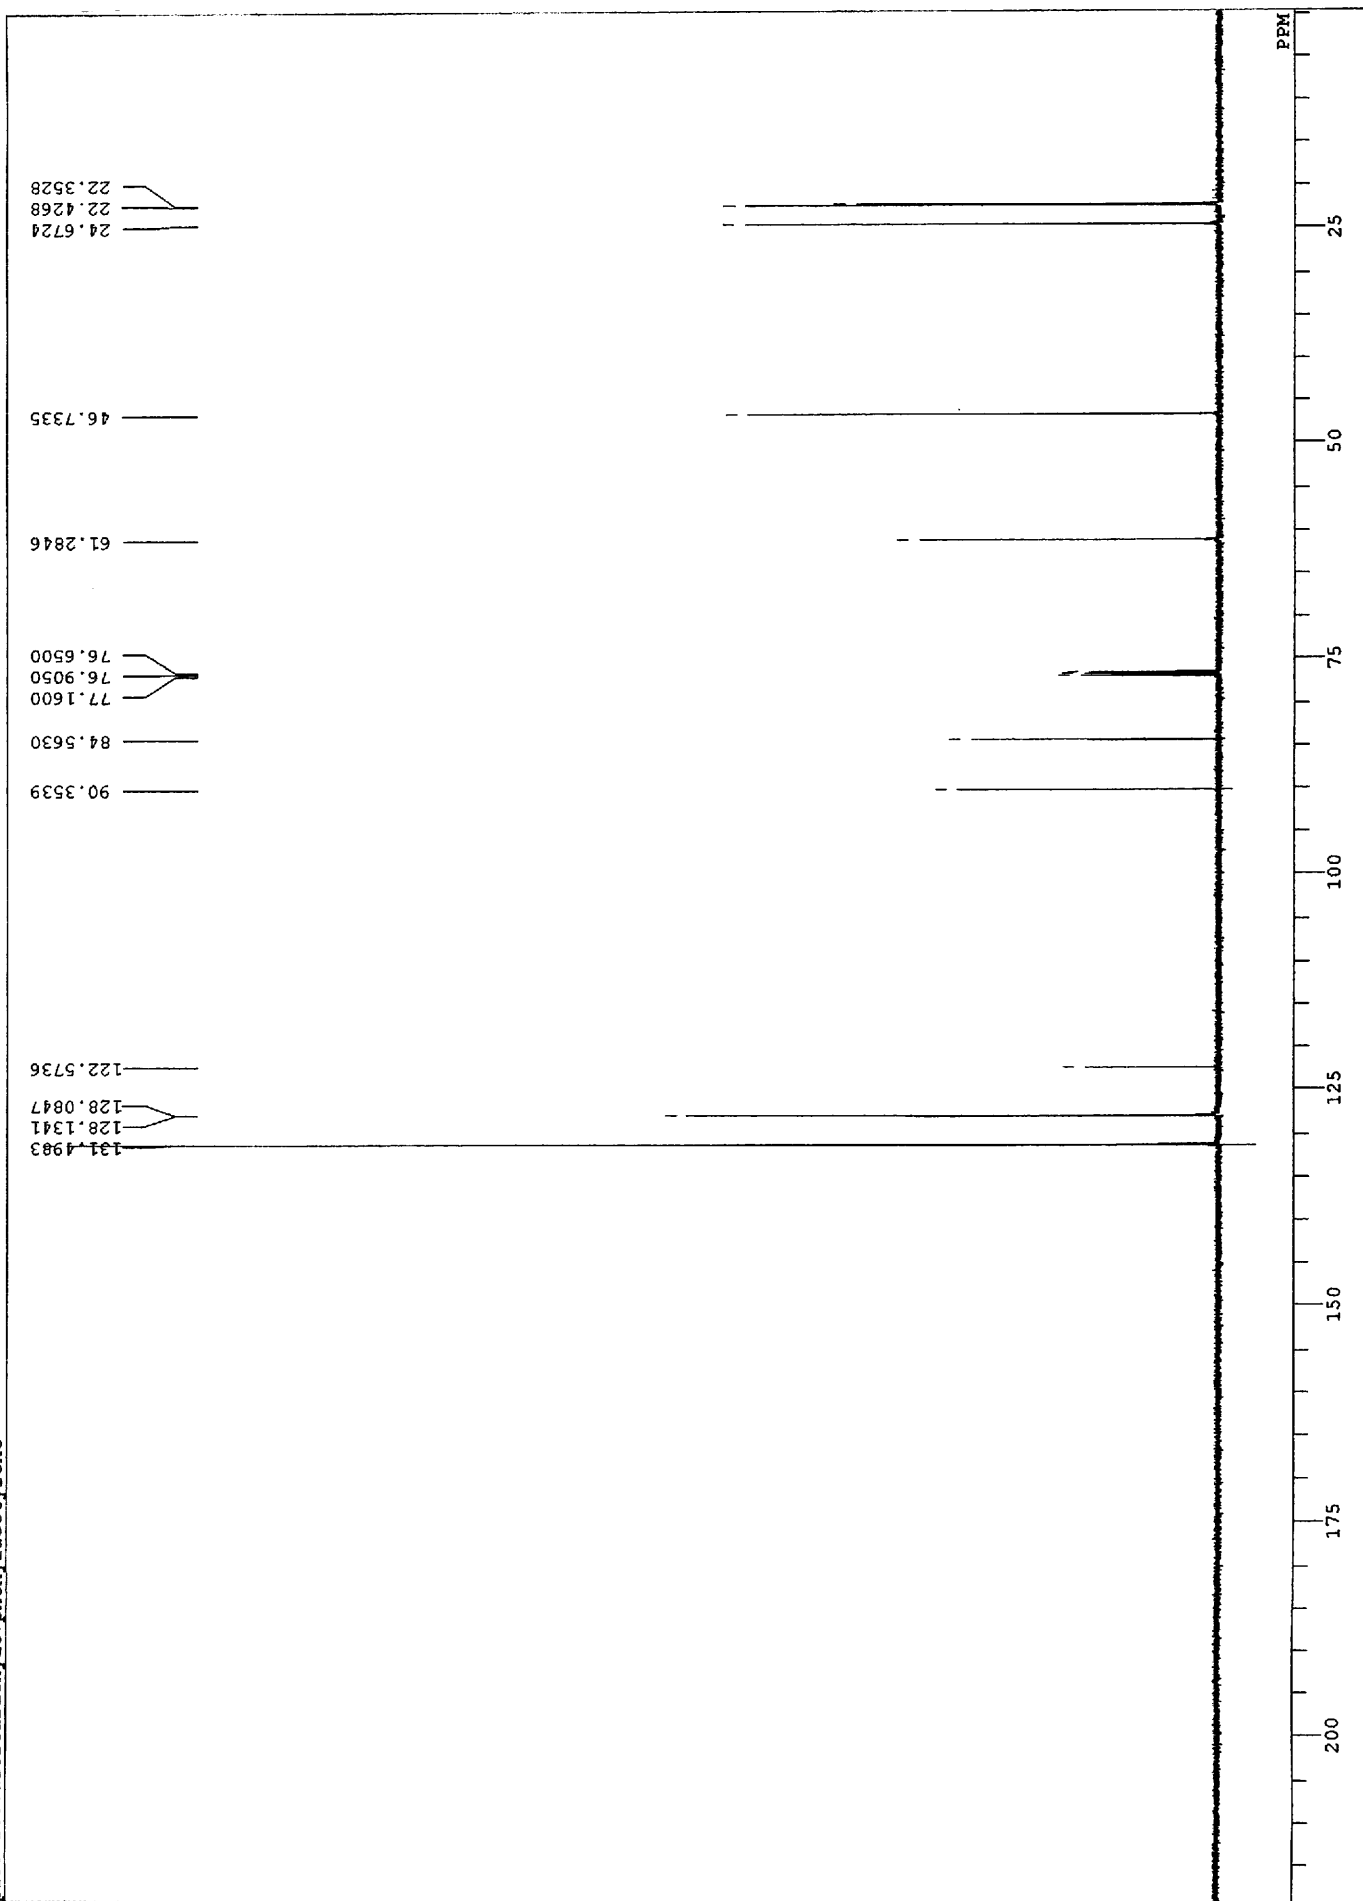

D:\050829\_5\_13C\savedata77.nmfid  
p135 isovaleraldehyde+4-phenyl-1-butyne

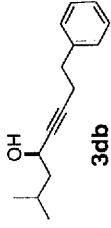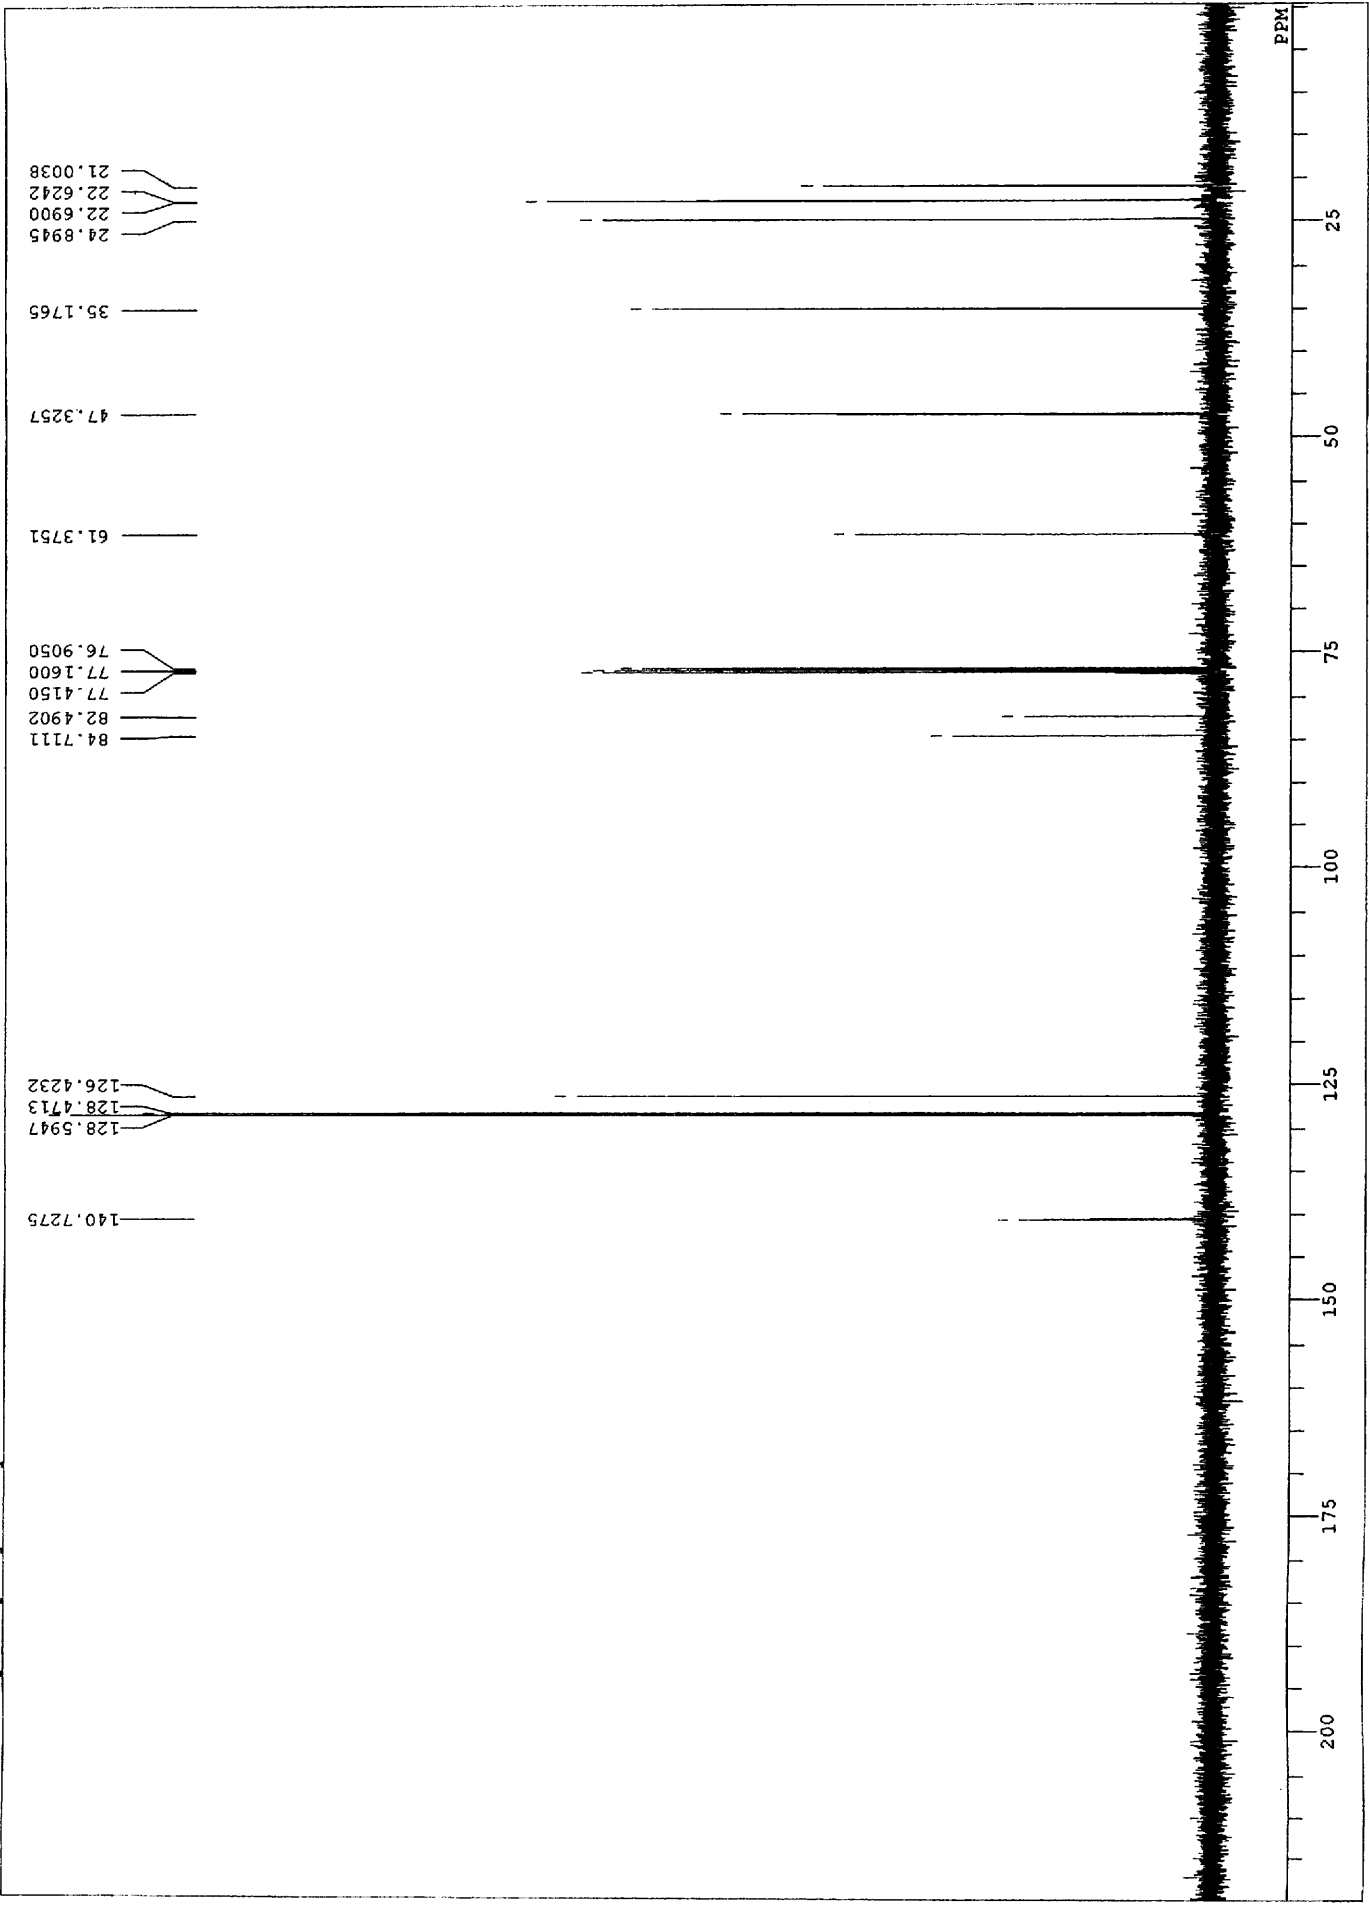

D:\050829\_13C\savedata77.nmfid  
p136 hydrocinnamaldehyde+phenylacetylene

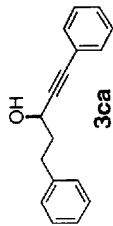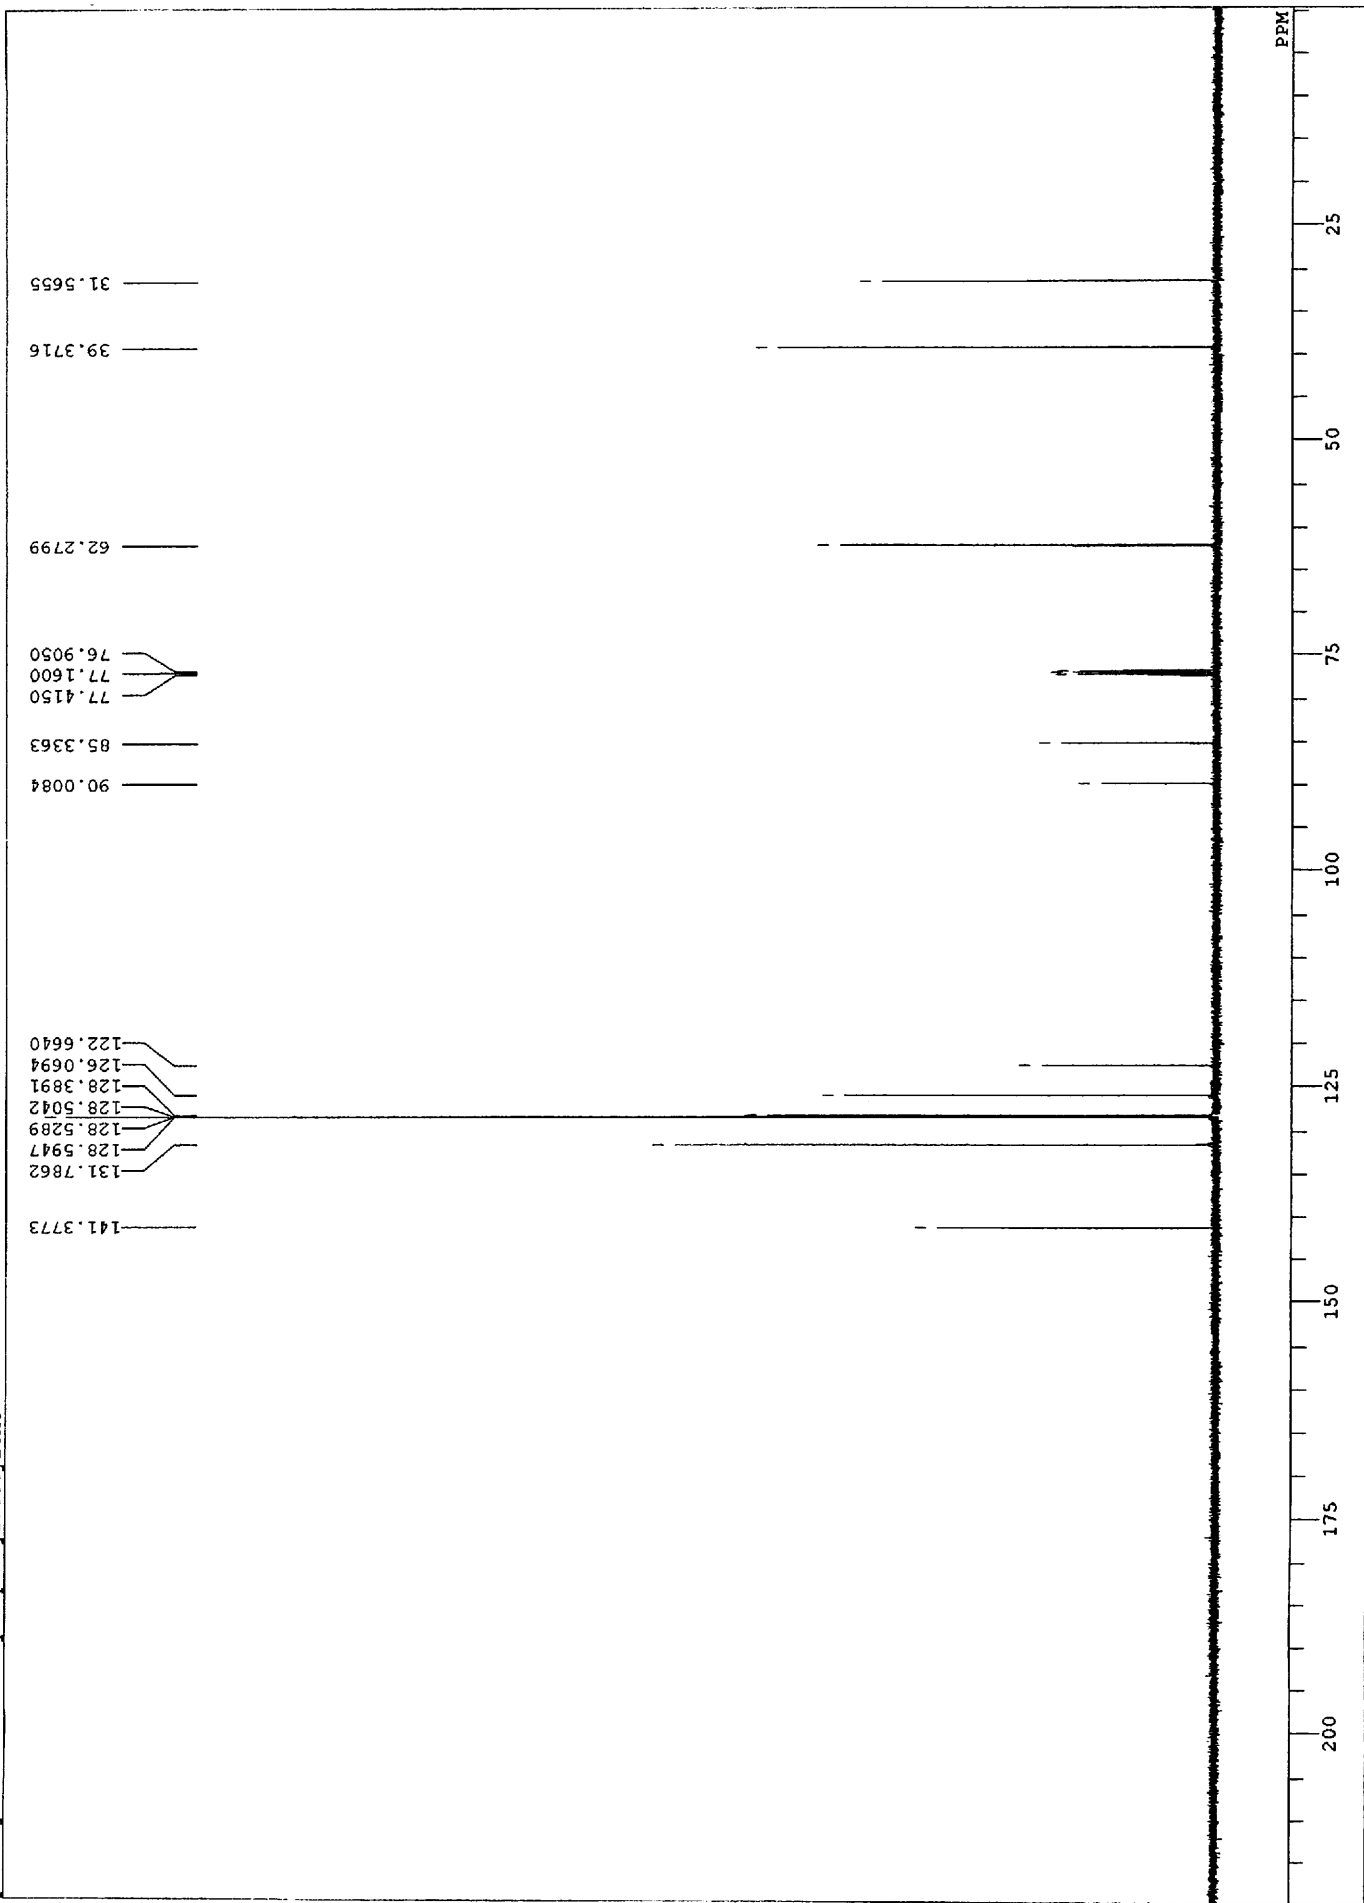

D:\050818\_13C\save\data77.nmfid  
p134\_benzaldehyde-phenylacetylene

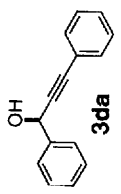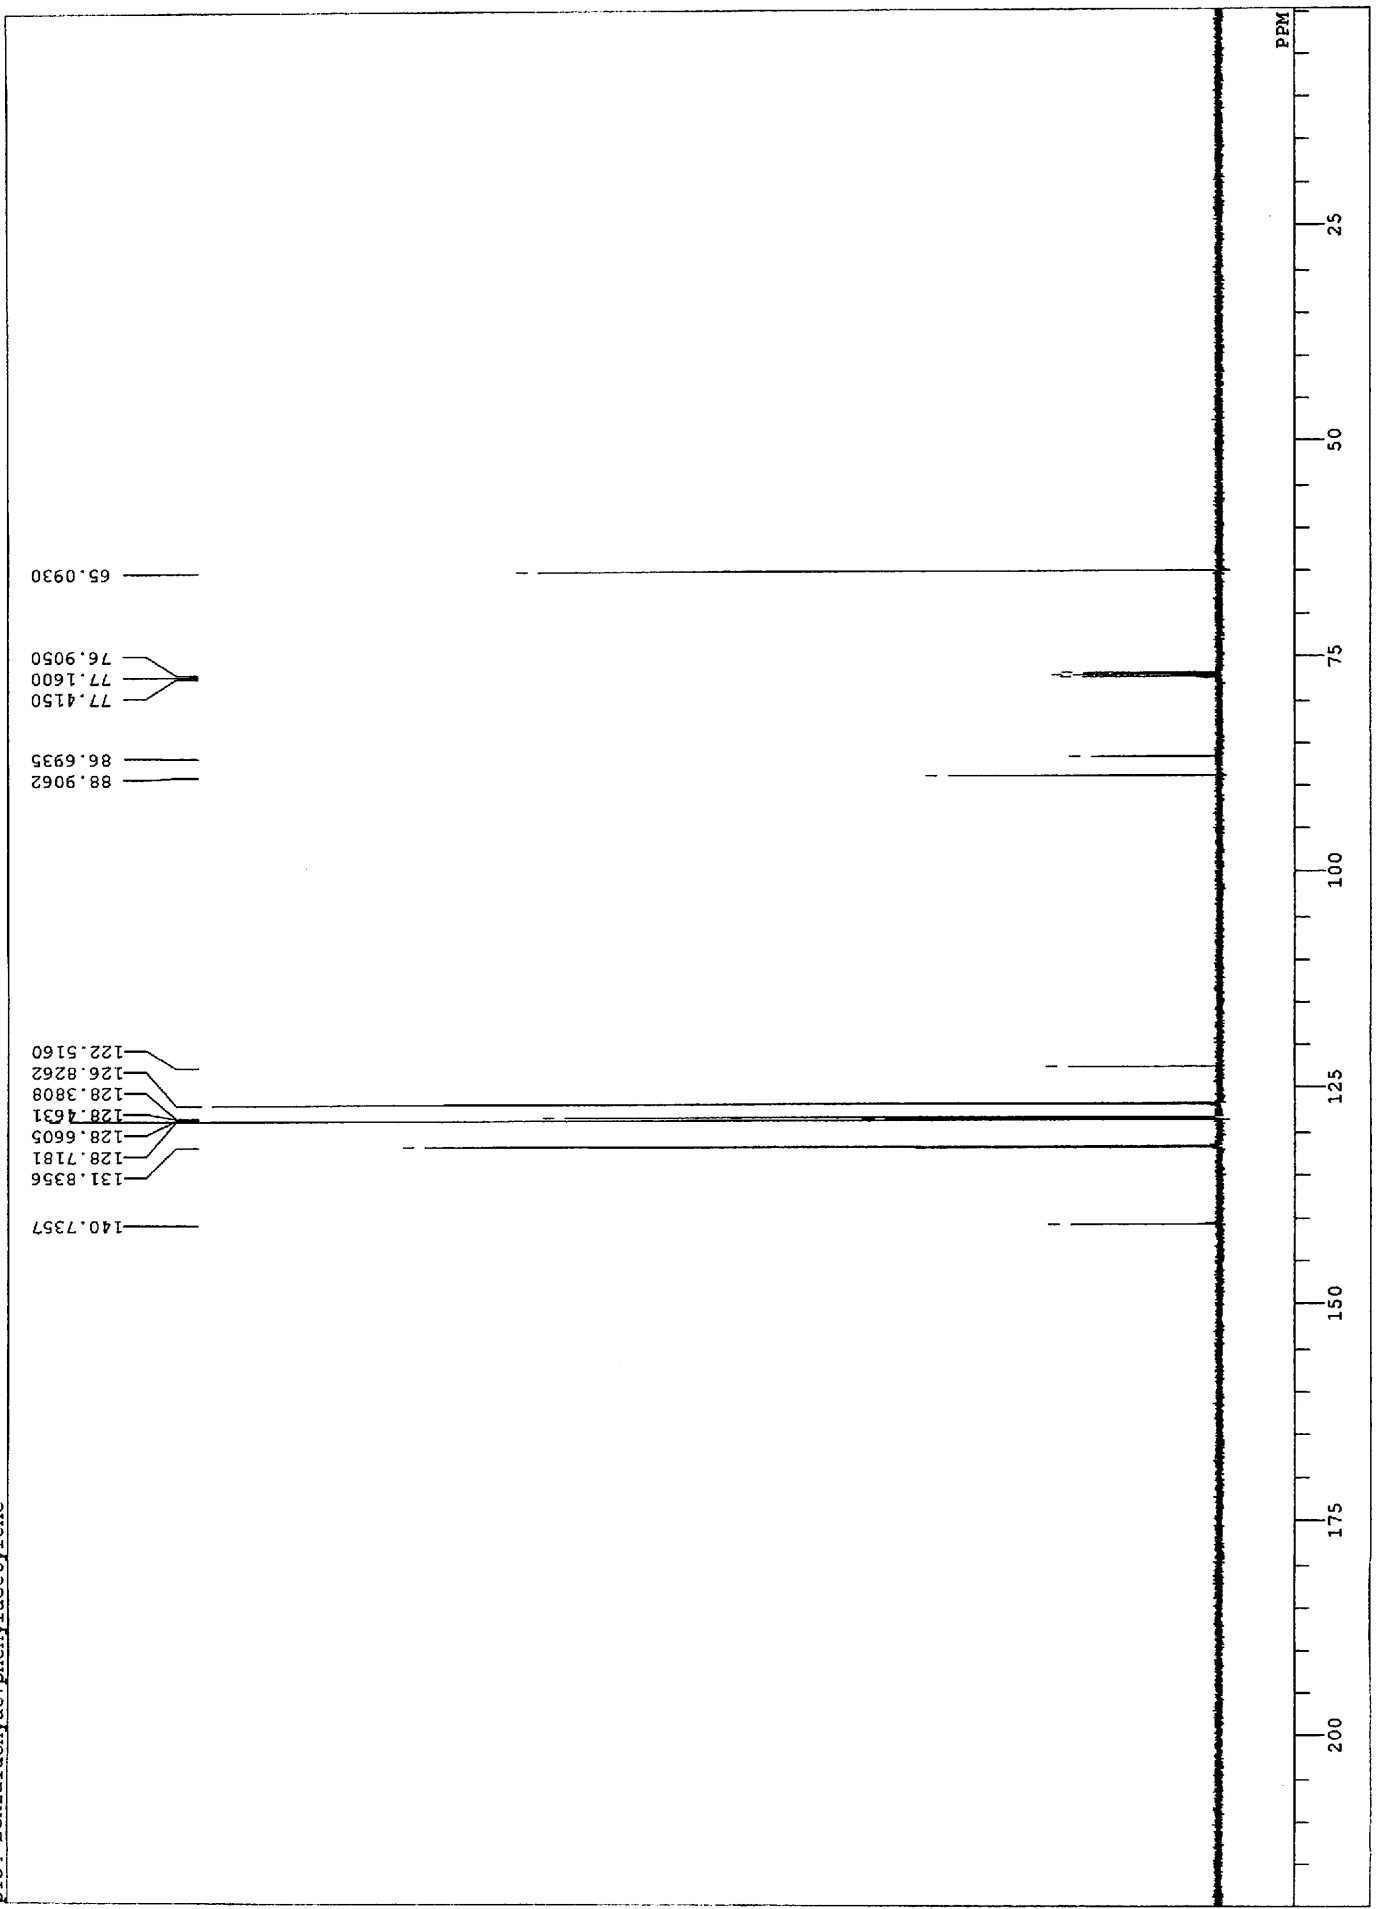

D:\050812\_3\_13C\savedata77.nmfid  
p123-2\_benzaldehyde+4-Ph-1-butynol

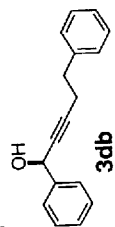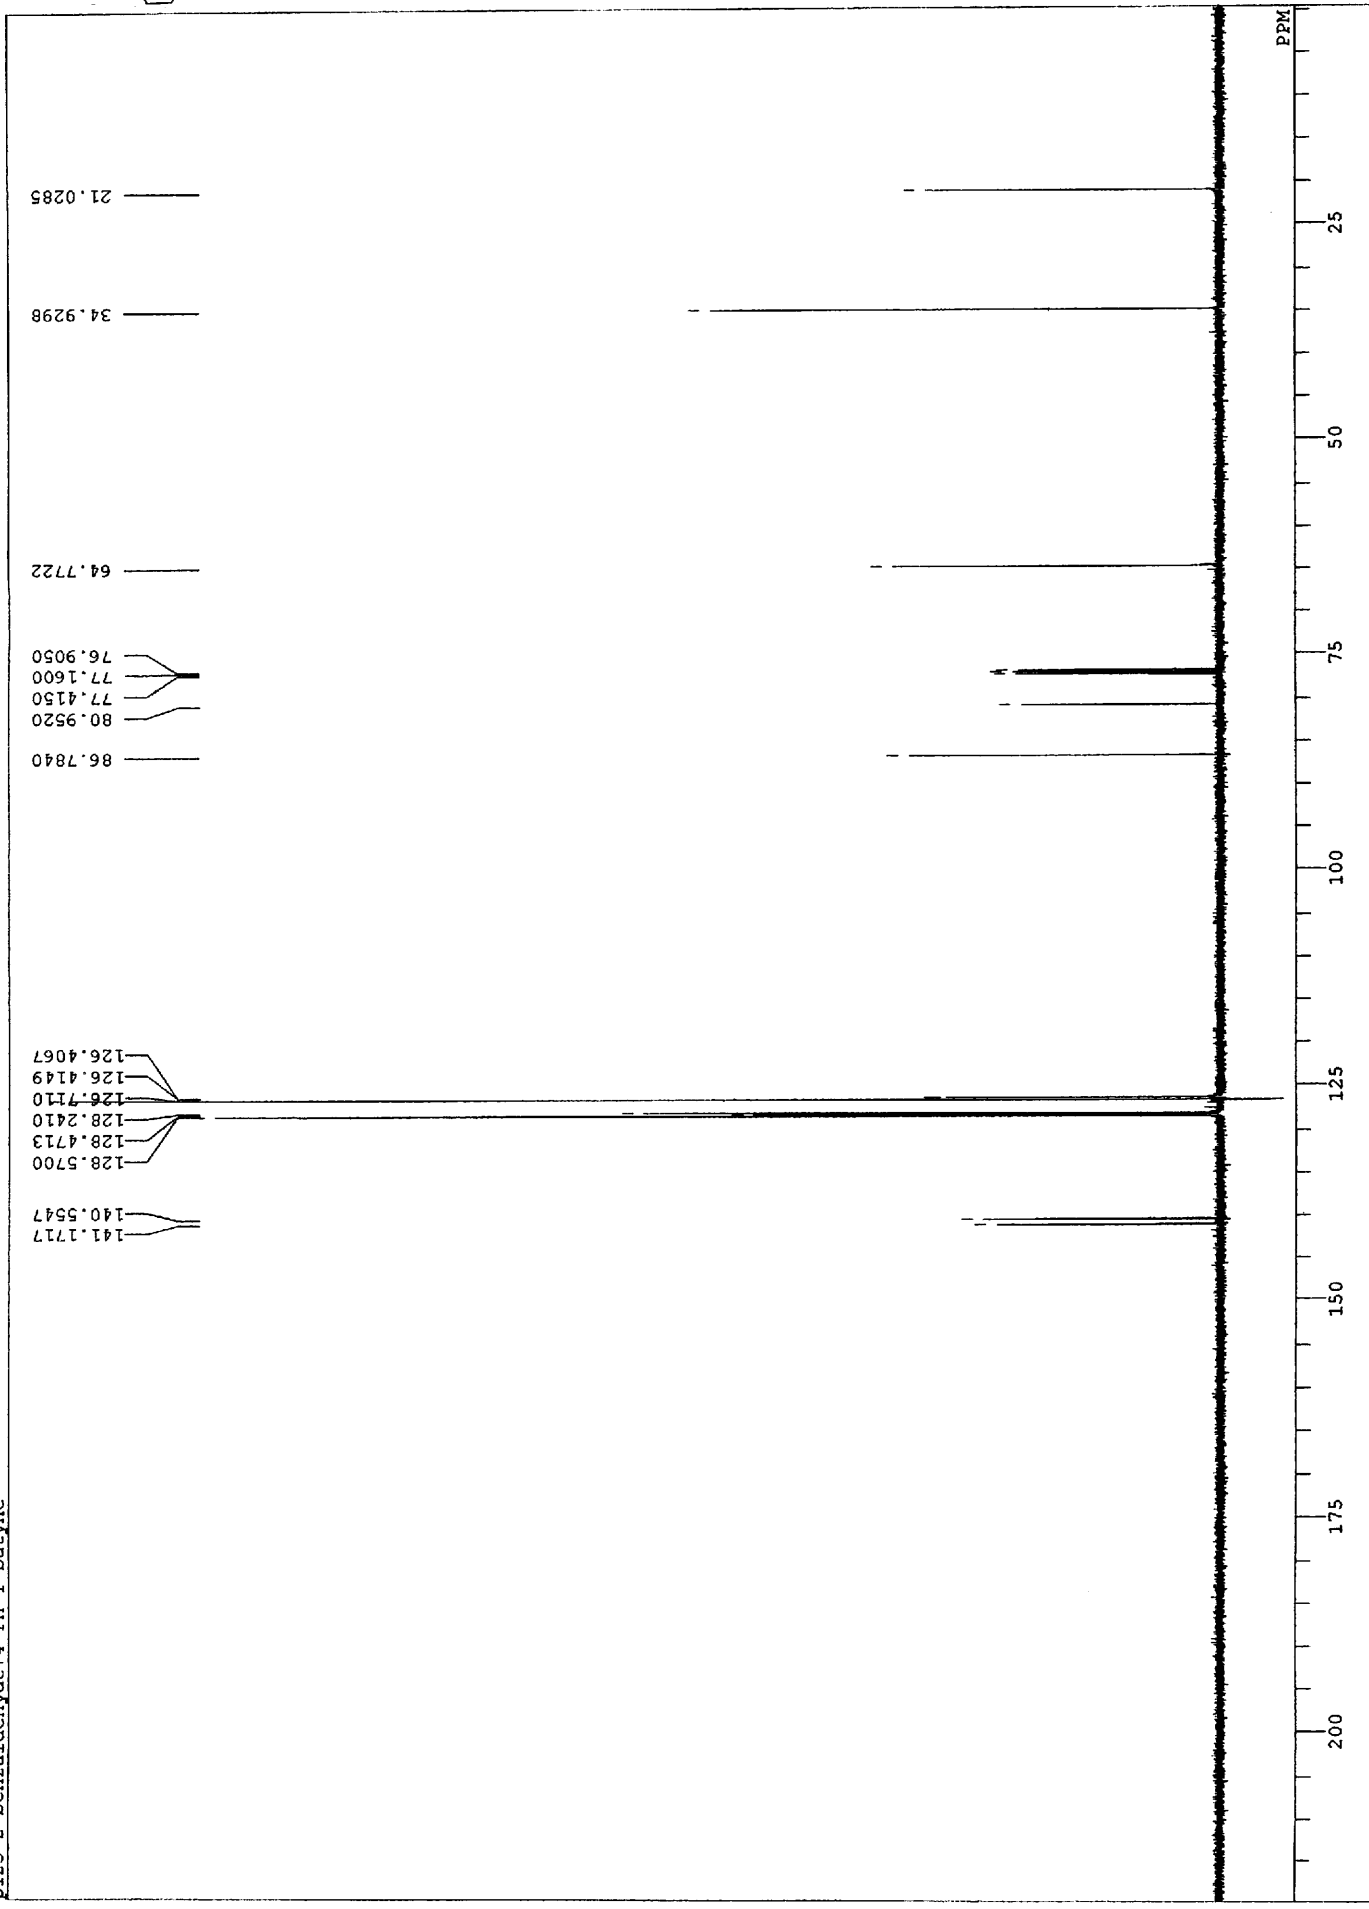



D:\050528\_2\_13C\savedata77.nmfid  
p67-2\_benzaldehydetethynylcyclohexene

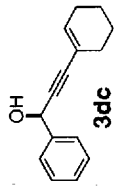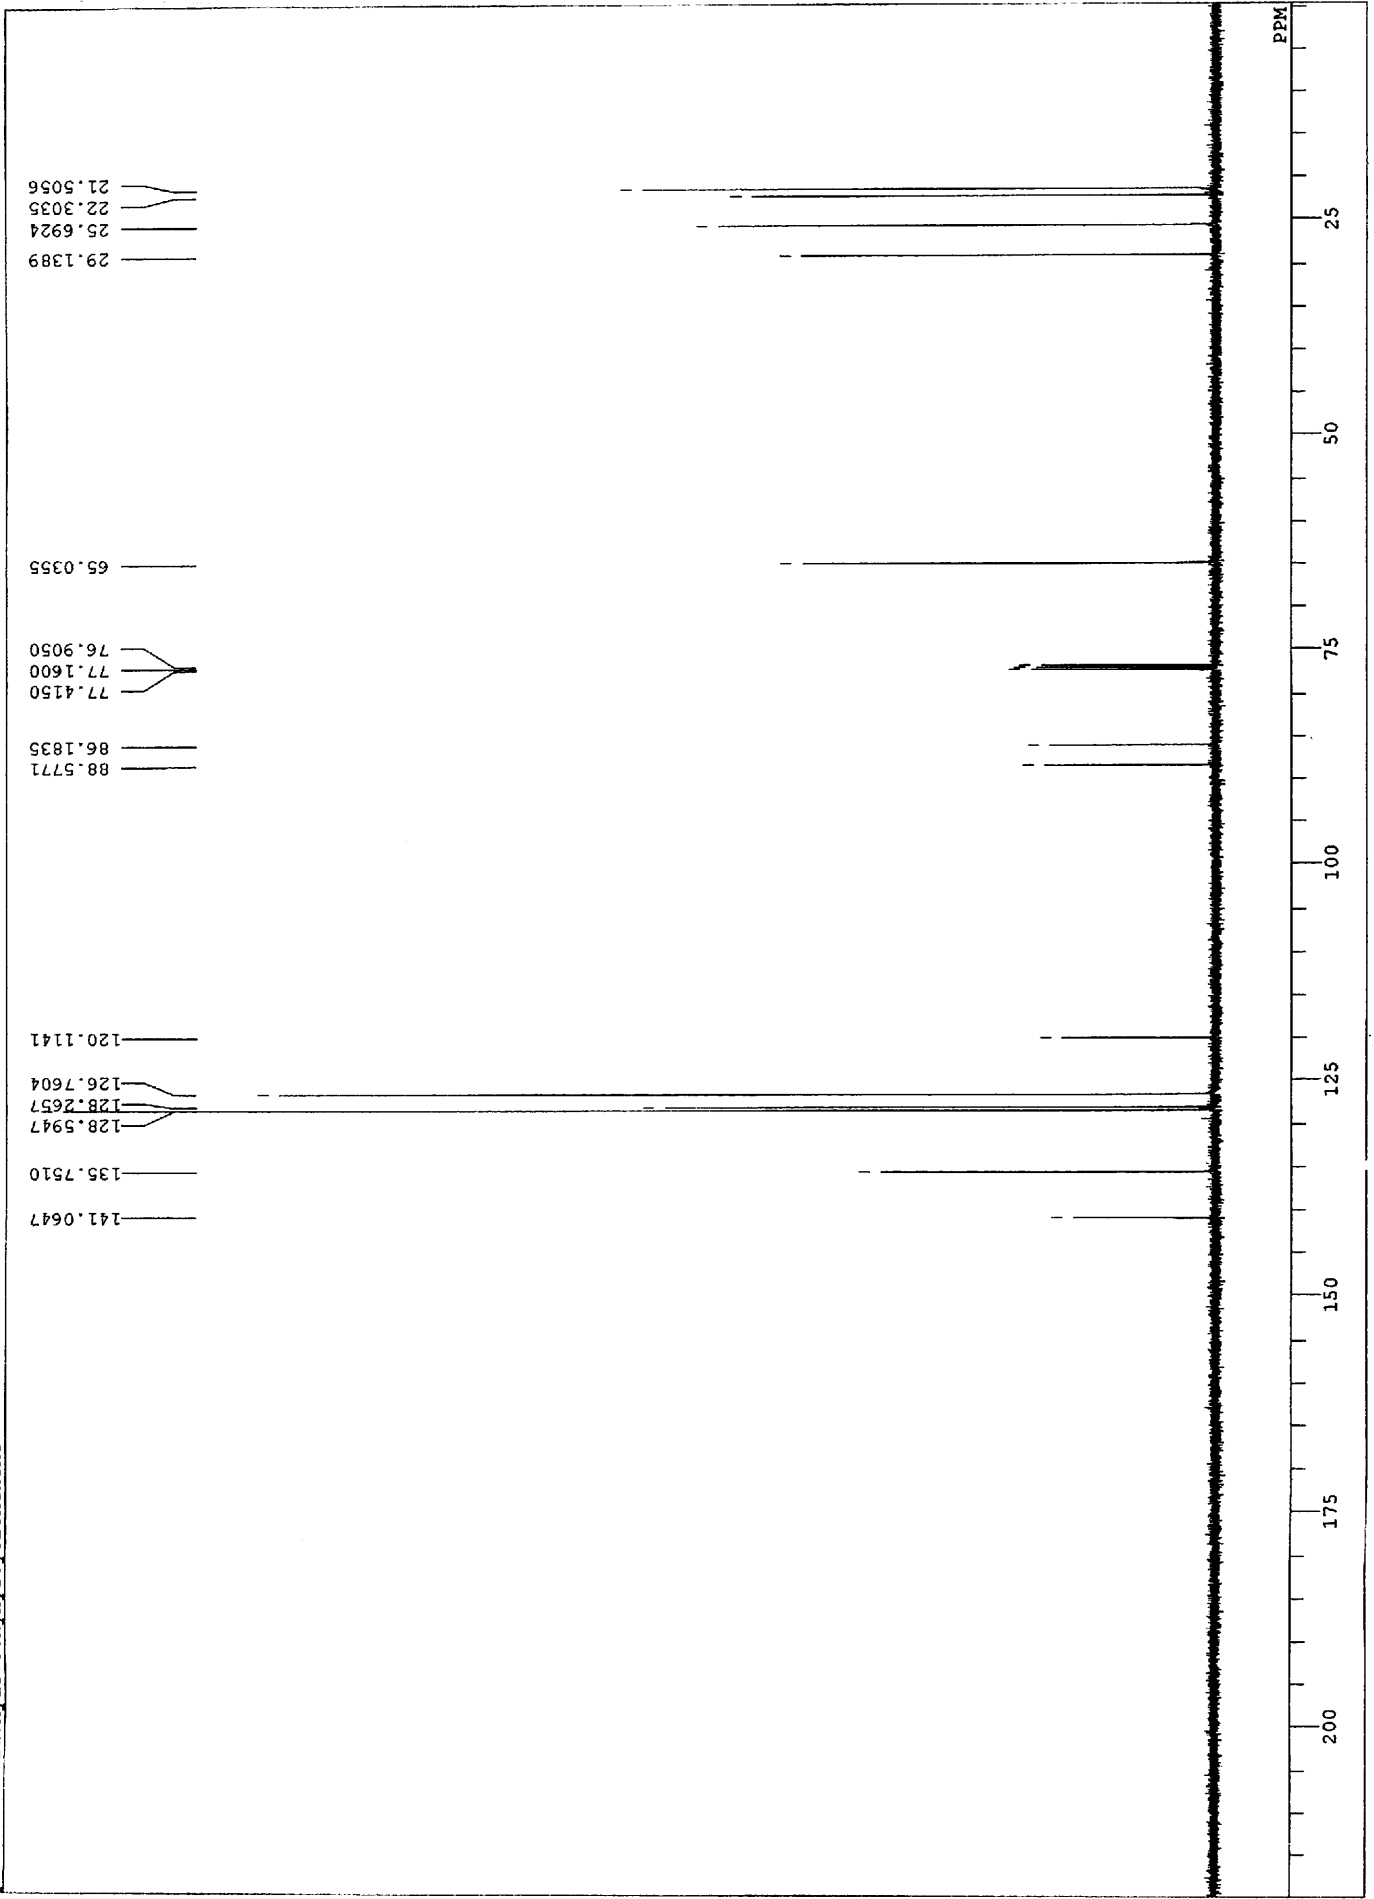

D:\050818\_2\_13C\avedata77.nmfid  
p133\_benzaldehyde+ethynylcyclopropane

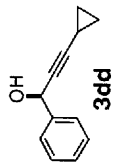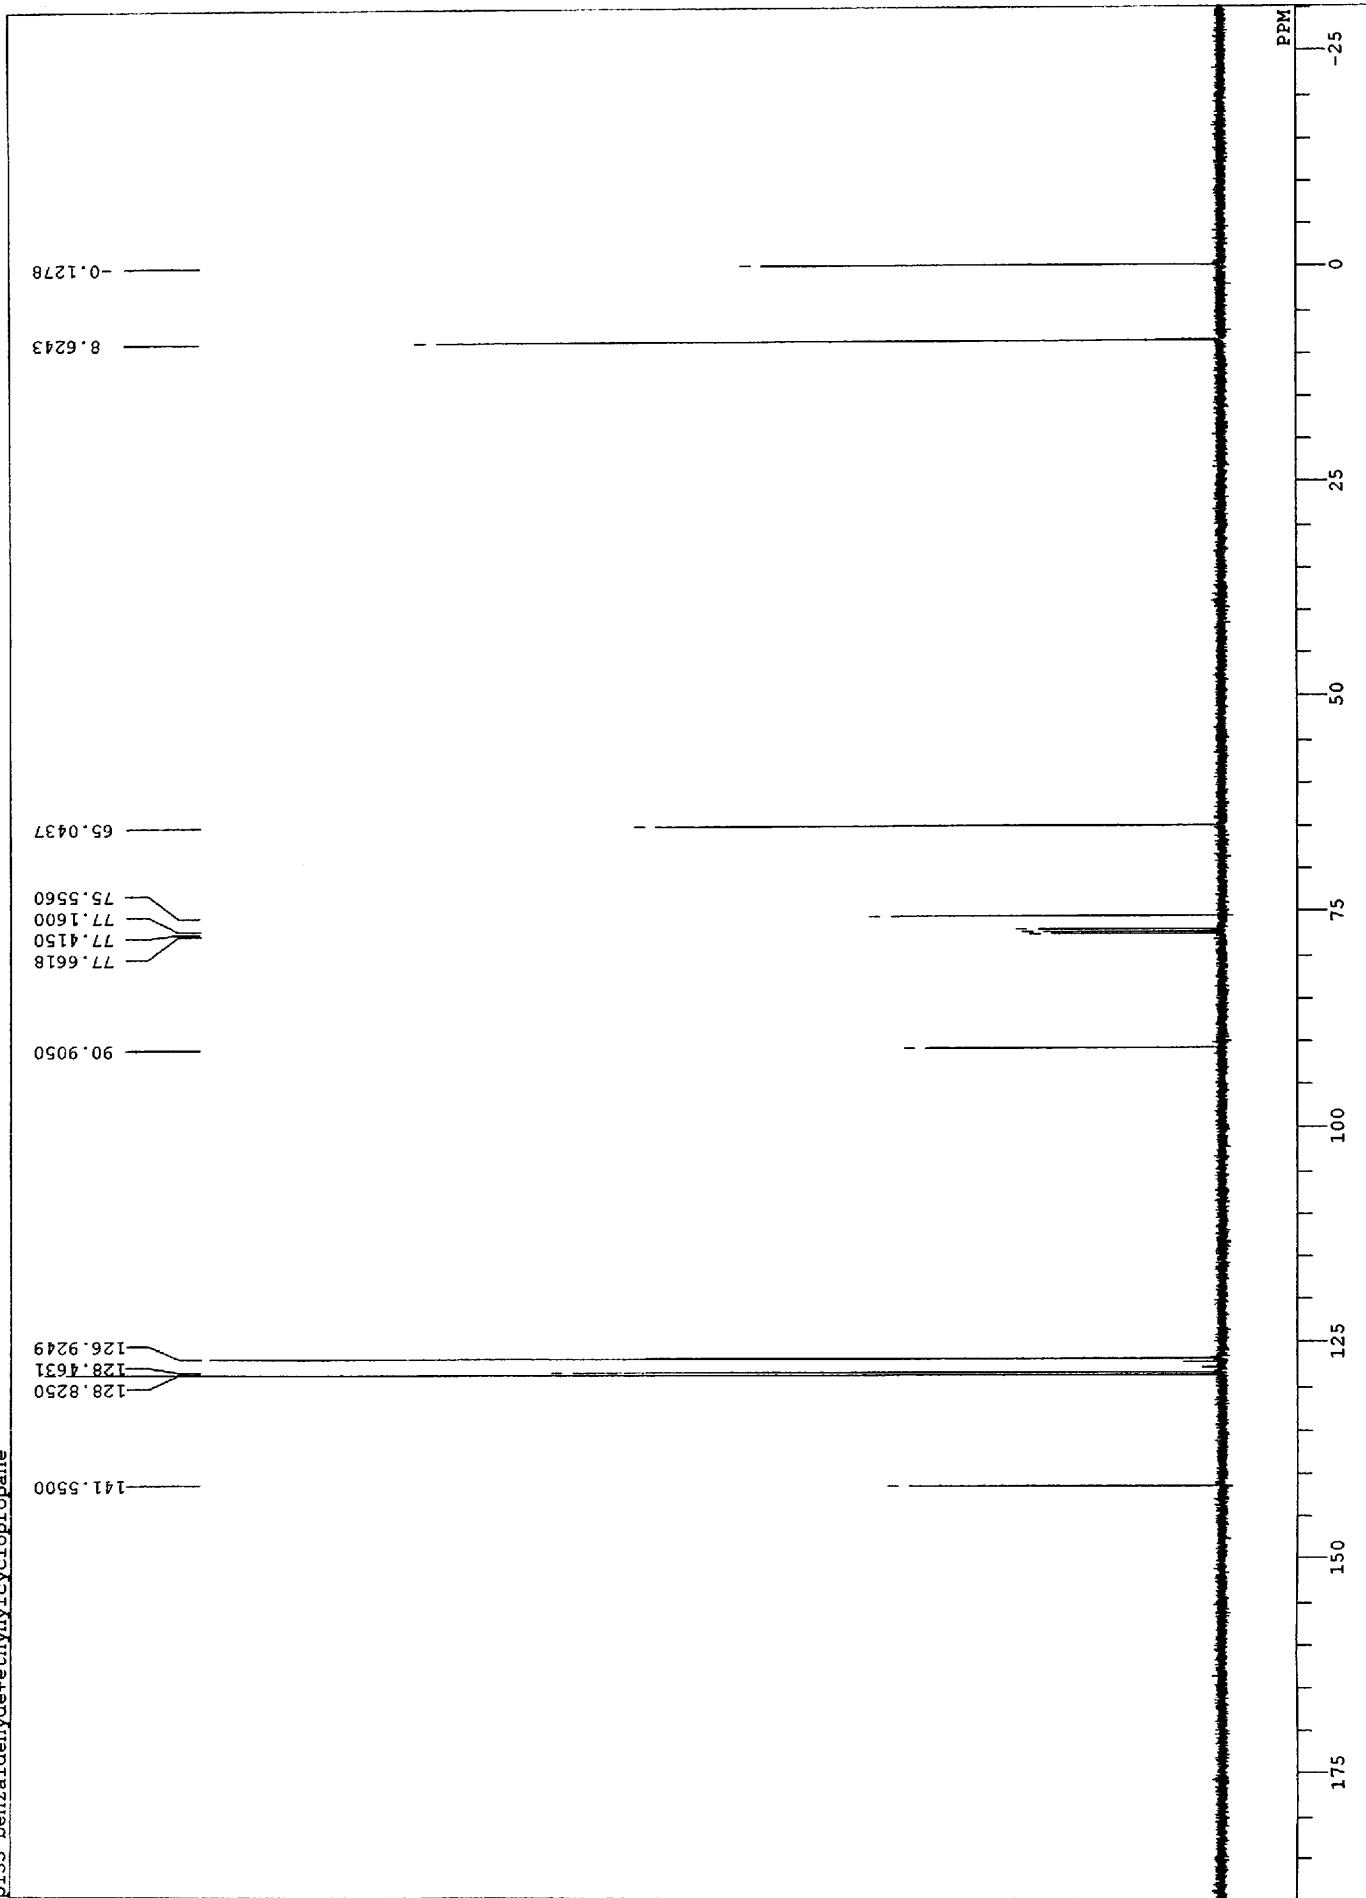

D:\050816\_03\_13C\savedata7.nmfid  
p124 p-F-benzaldehyde+phenylacetylene

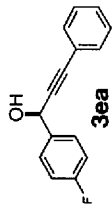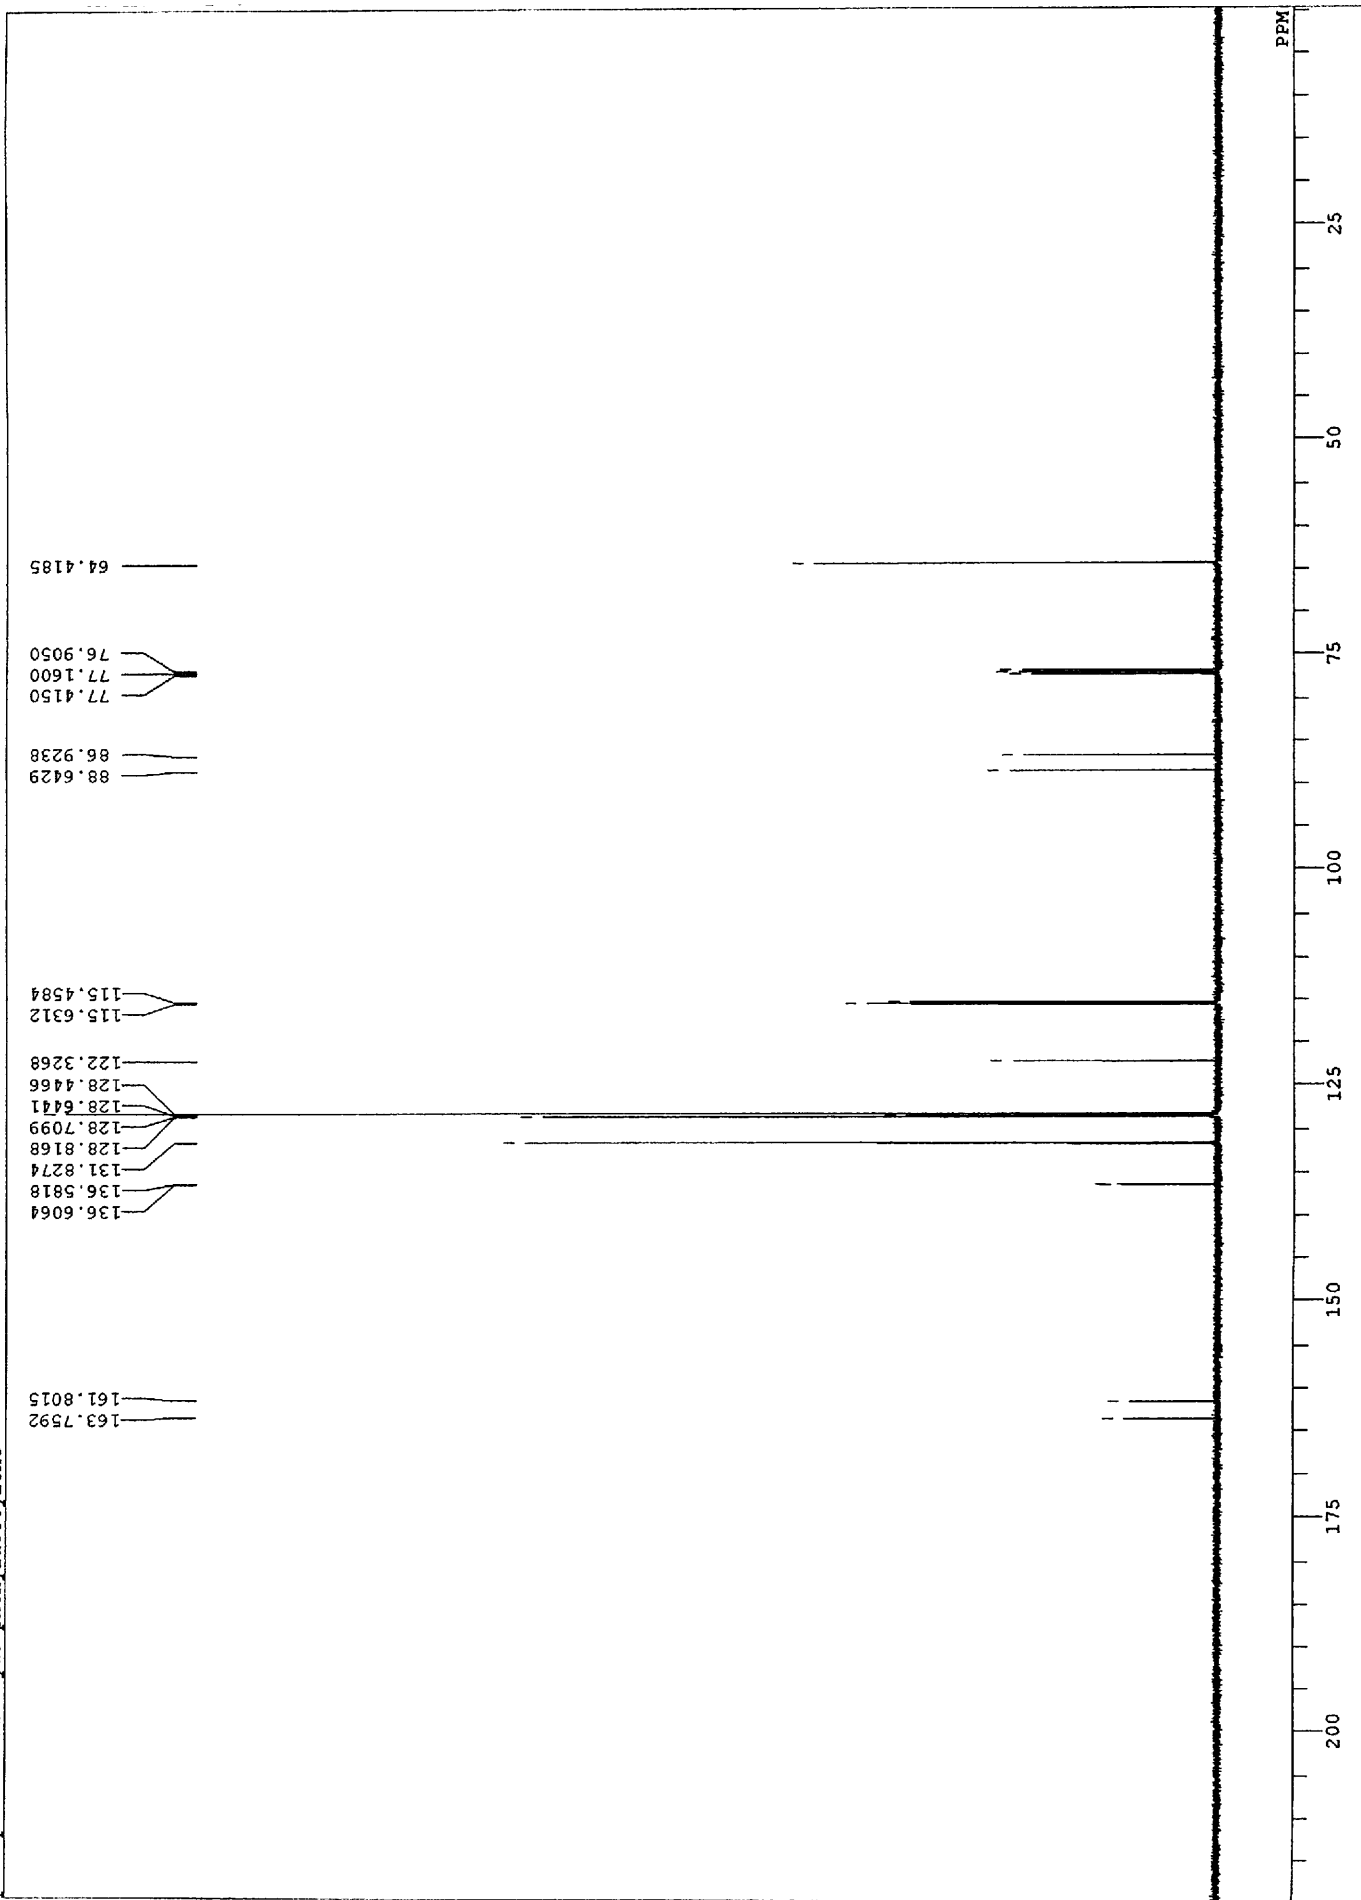

D:\050829\_3\savedata7.nmfd  
p128 p-f-Benzaldehyde+4-Ph-1-butyne

- 7.4614
- 7.4553
- 7.4510
- 7.4443
- 7.4418
- 7.4376
- 7.4315
- 7.4266
- 7.3473
- 7.3448
- 7.3418
- 7.3344
- 7.3308
- 7.3186
- 7.3161
- 7.2795
- 7.2765
- 7.2716
- 7.2692
- 7.2643
- 7.2600
- 7.2545
- 7.2521
- 7.2374
- 7.2321
- 7.0721
- 7.0660
- 7.0623
- 7.0532
- 7.0489
- 7.0452
- 7.0355
- 7.0312
- 7.0257
- 5.4100

- 2.9035
- 2.8888
- 2.8736
- 2.6320
- 2.6283
- 2.6173
- 2.6130
- 2.6021
- 2.5984
- 2.3678

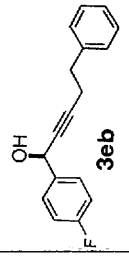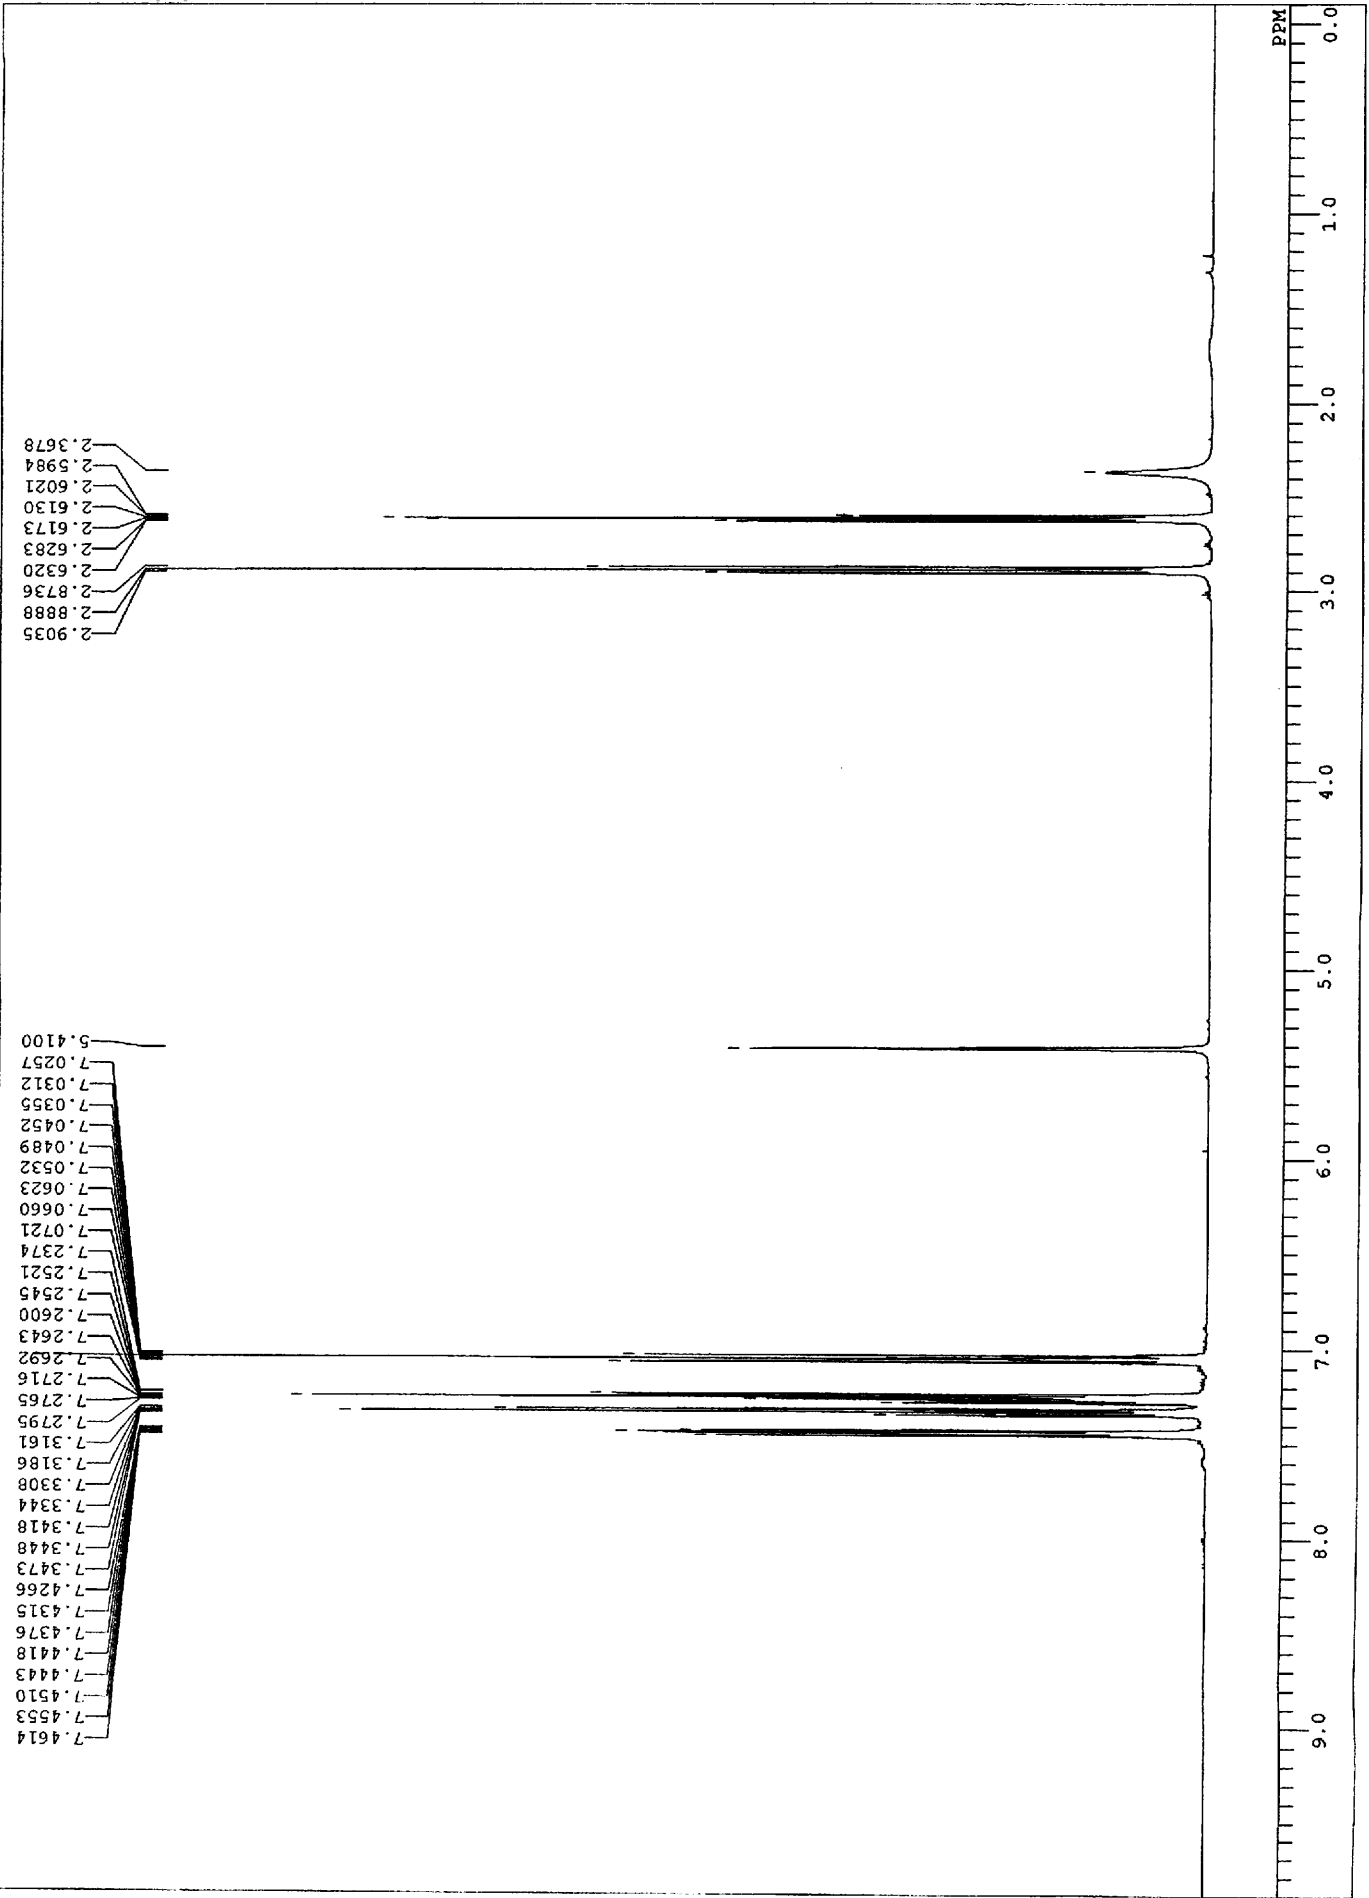

D:\050829\_3\_13C\savedata77.nmfid  
Pl28 p-F-benzaldehyde+4-Ph-1-butynol

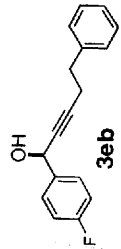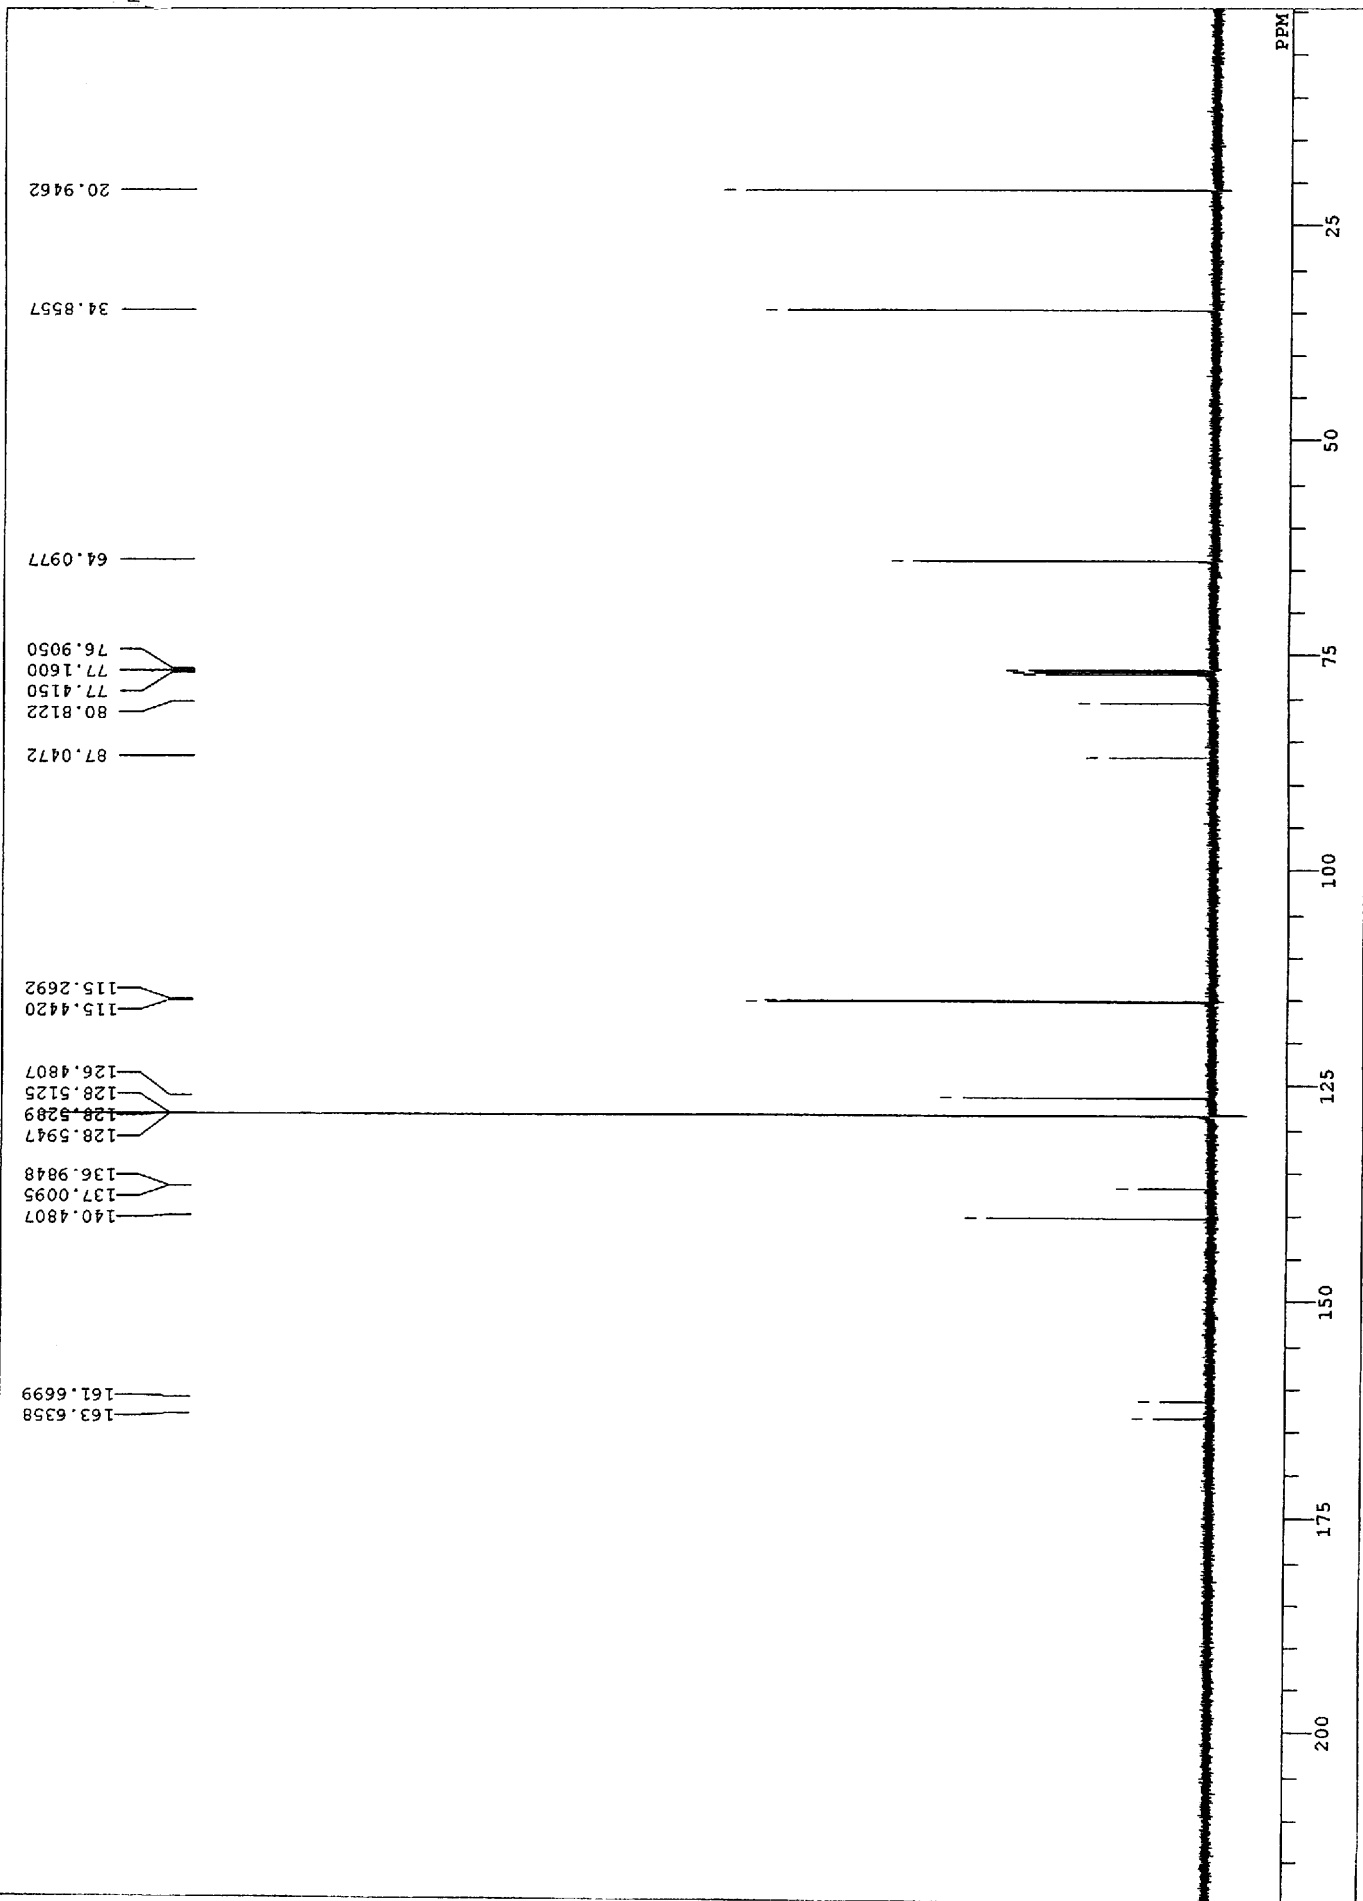

D:\rt050816\_01\_13C.als  
P125-2 m-MeO-benzaldehyde +phenylacetylene

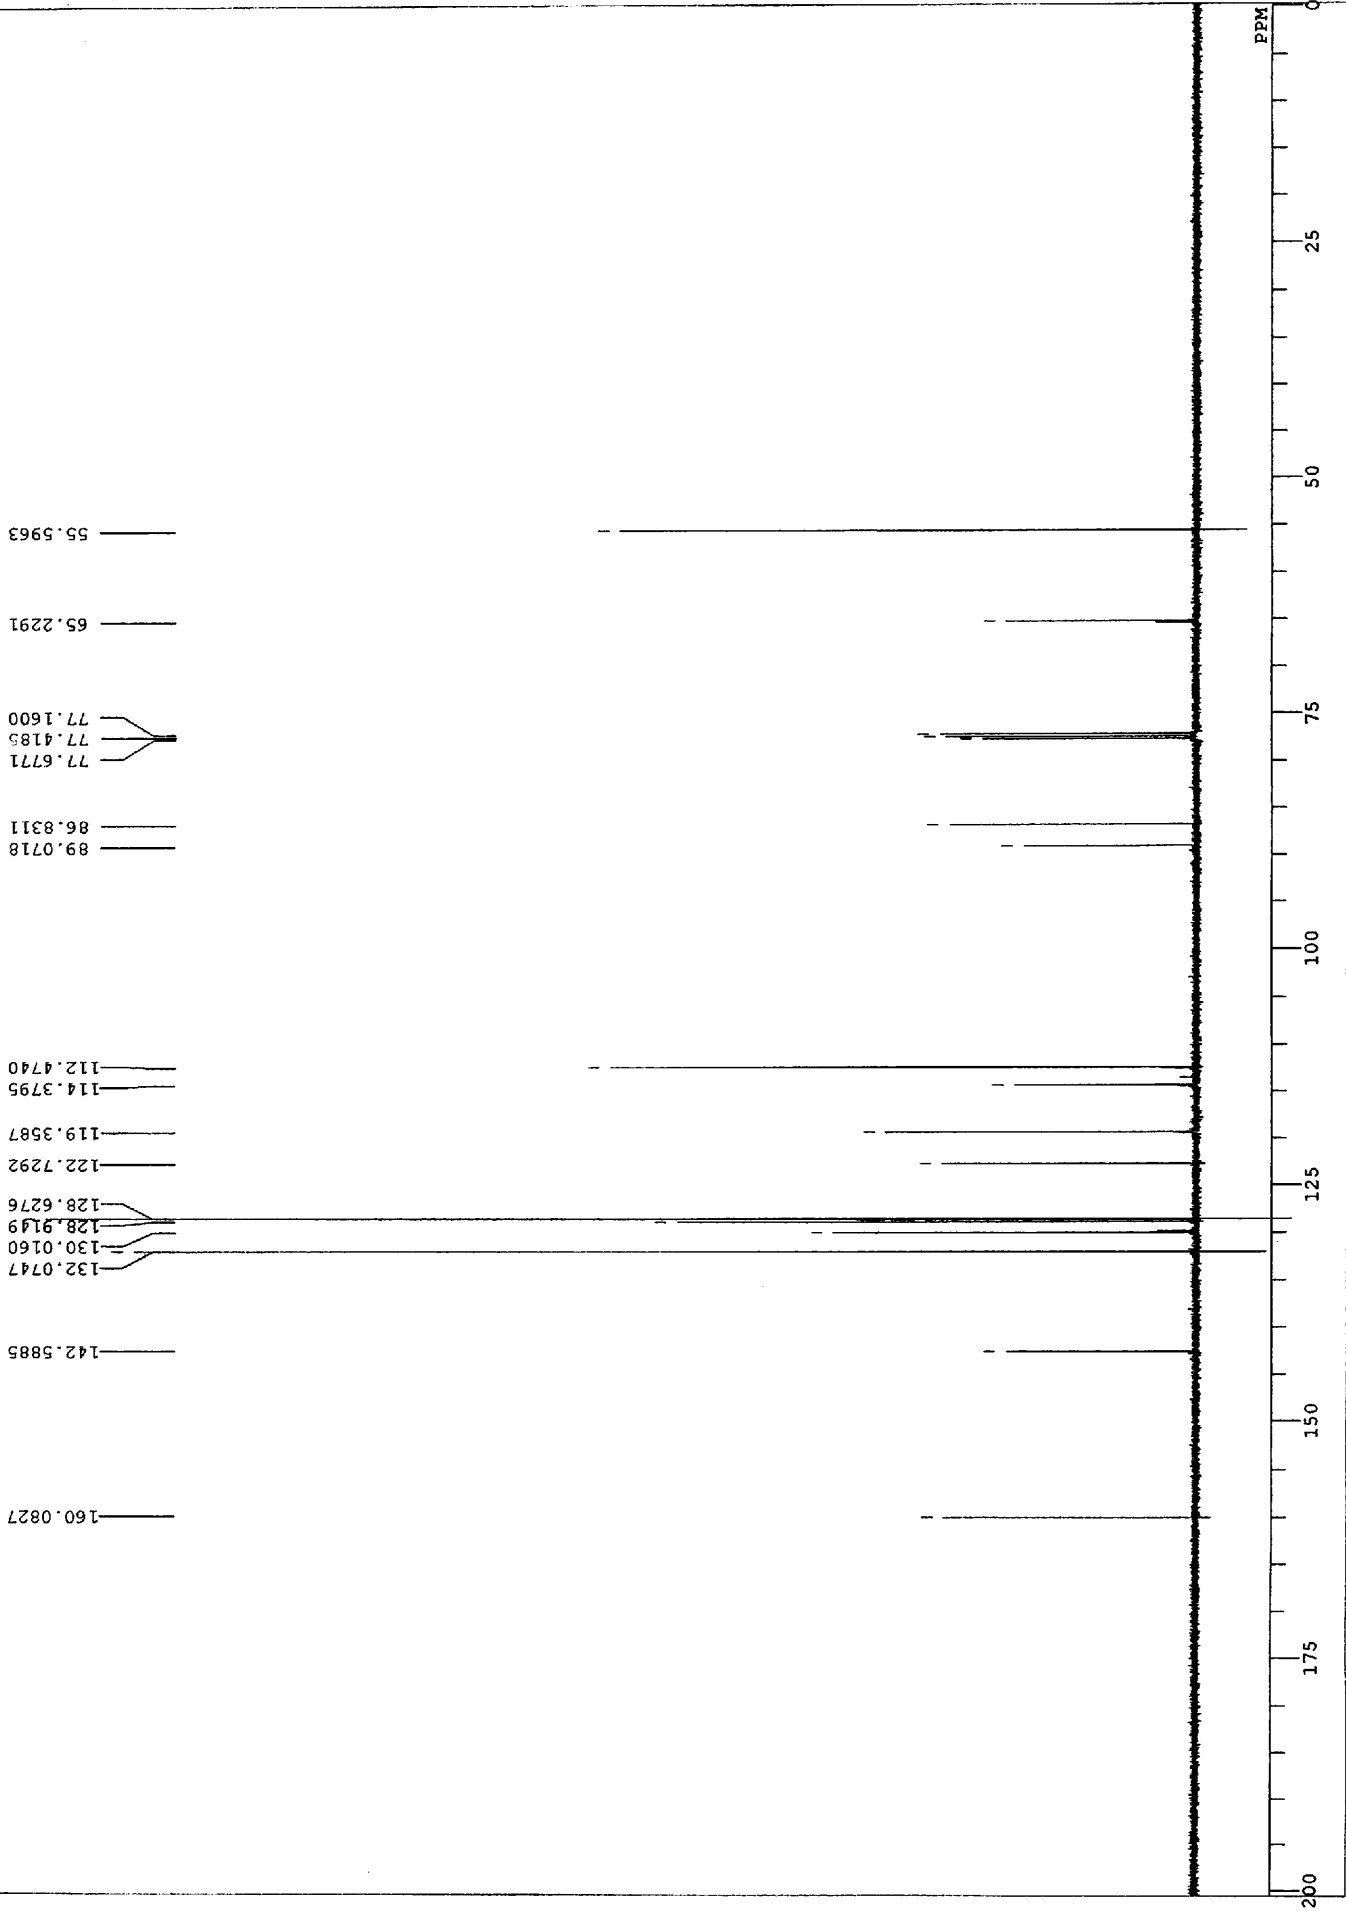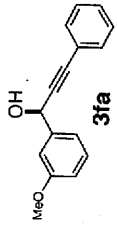

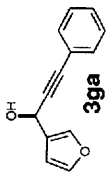

D:\050812\_2\savedata77.nmfid  
p122-2\_3-furaldehyd+phenylacetylene

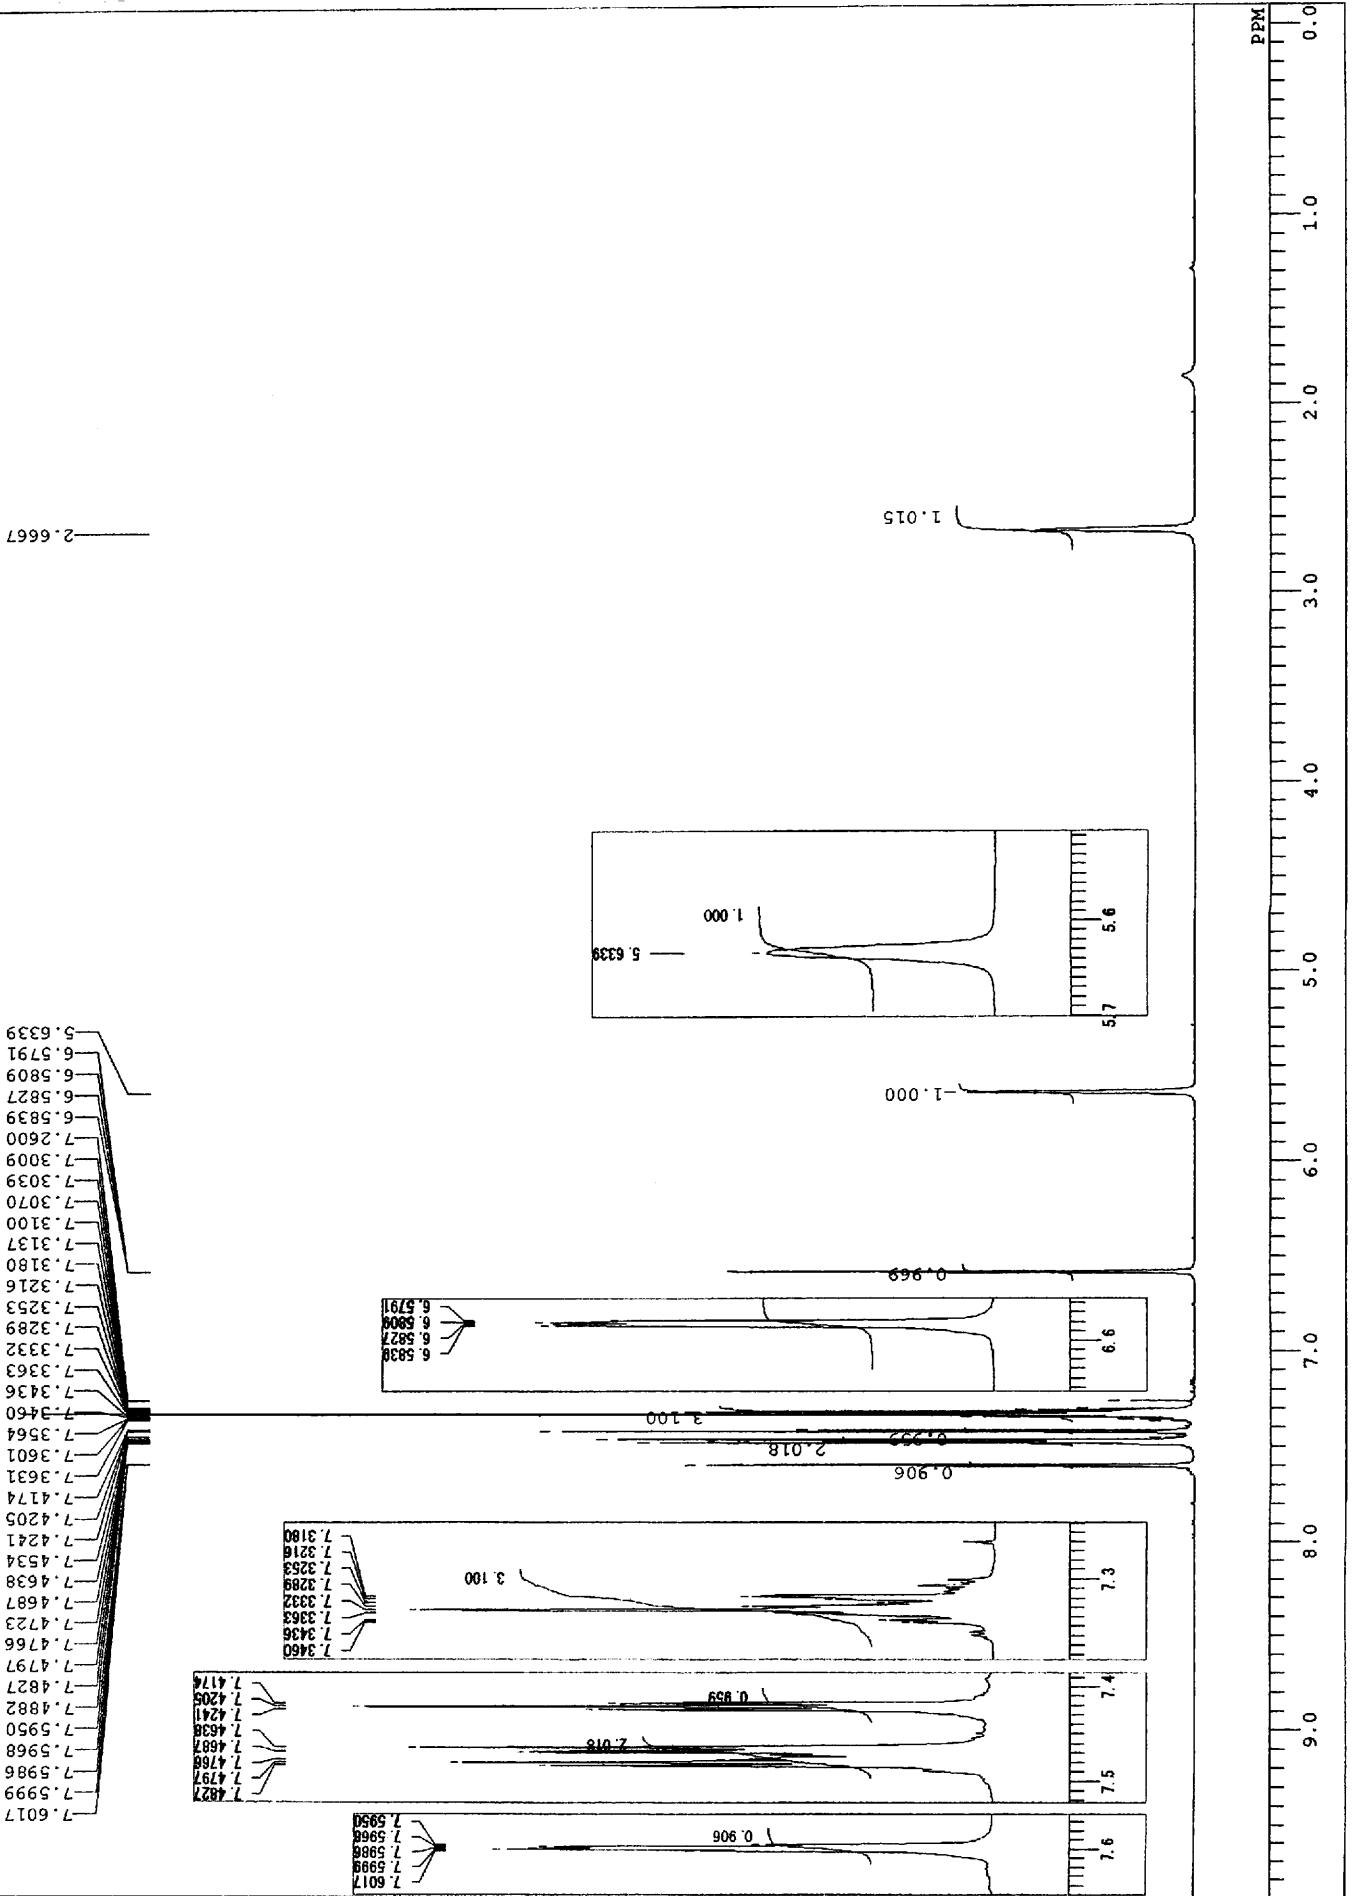

D:\050812\_2\_13C\savedata7.nmfid  
p122-2 3-furaldehyde-phenylacetylene

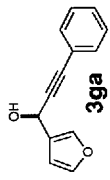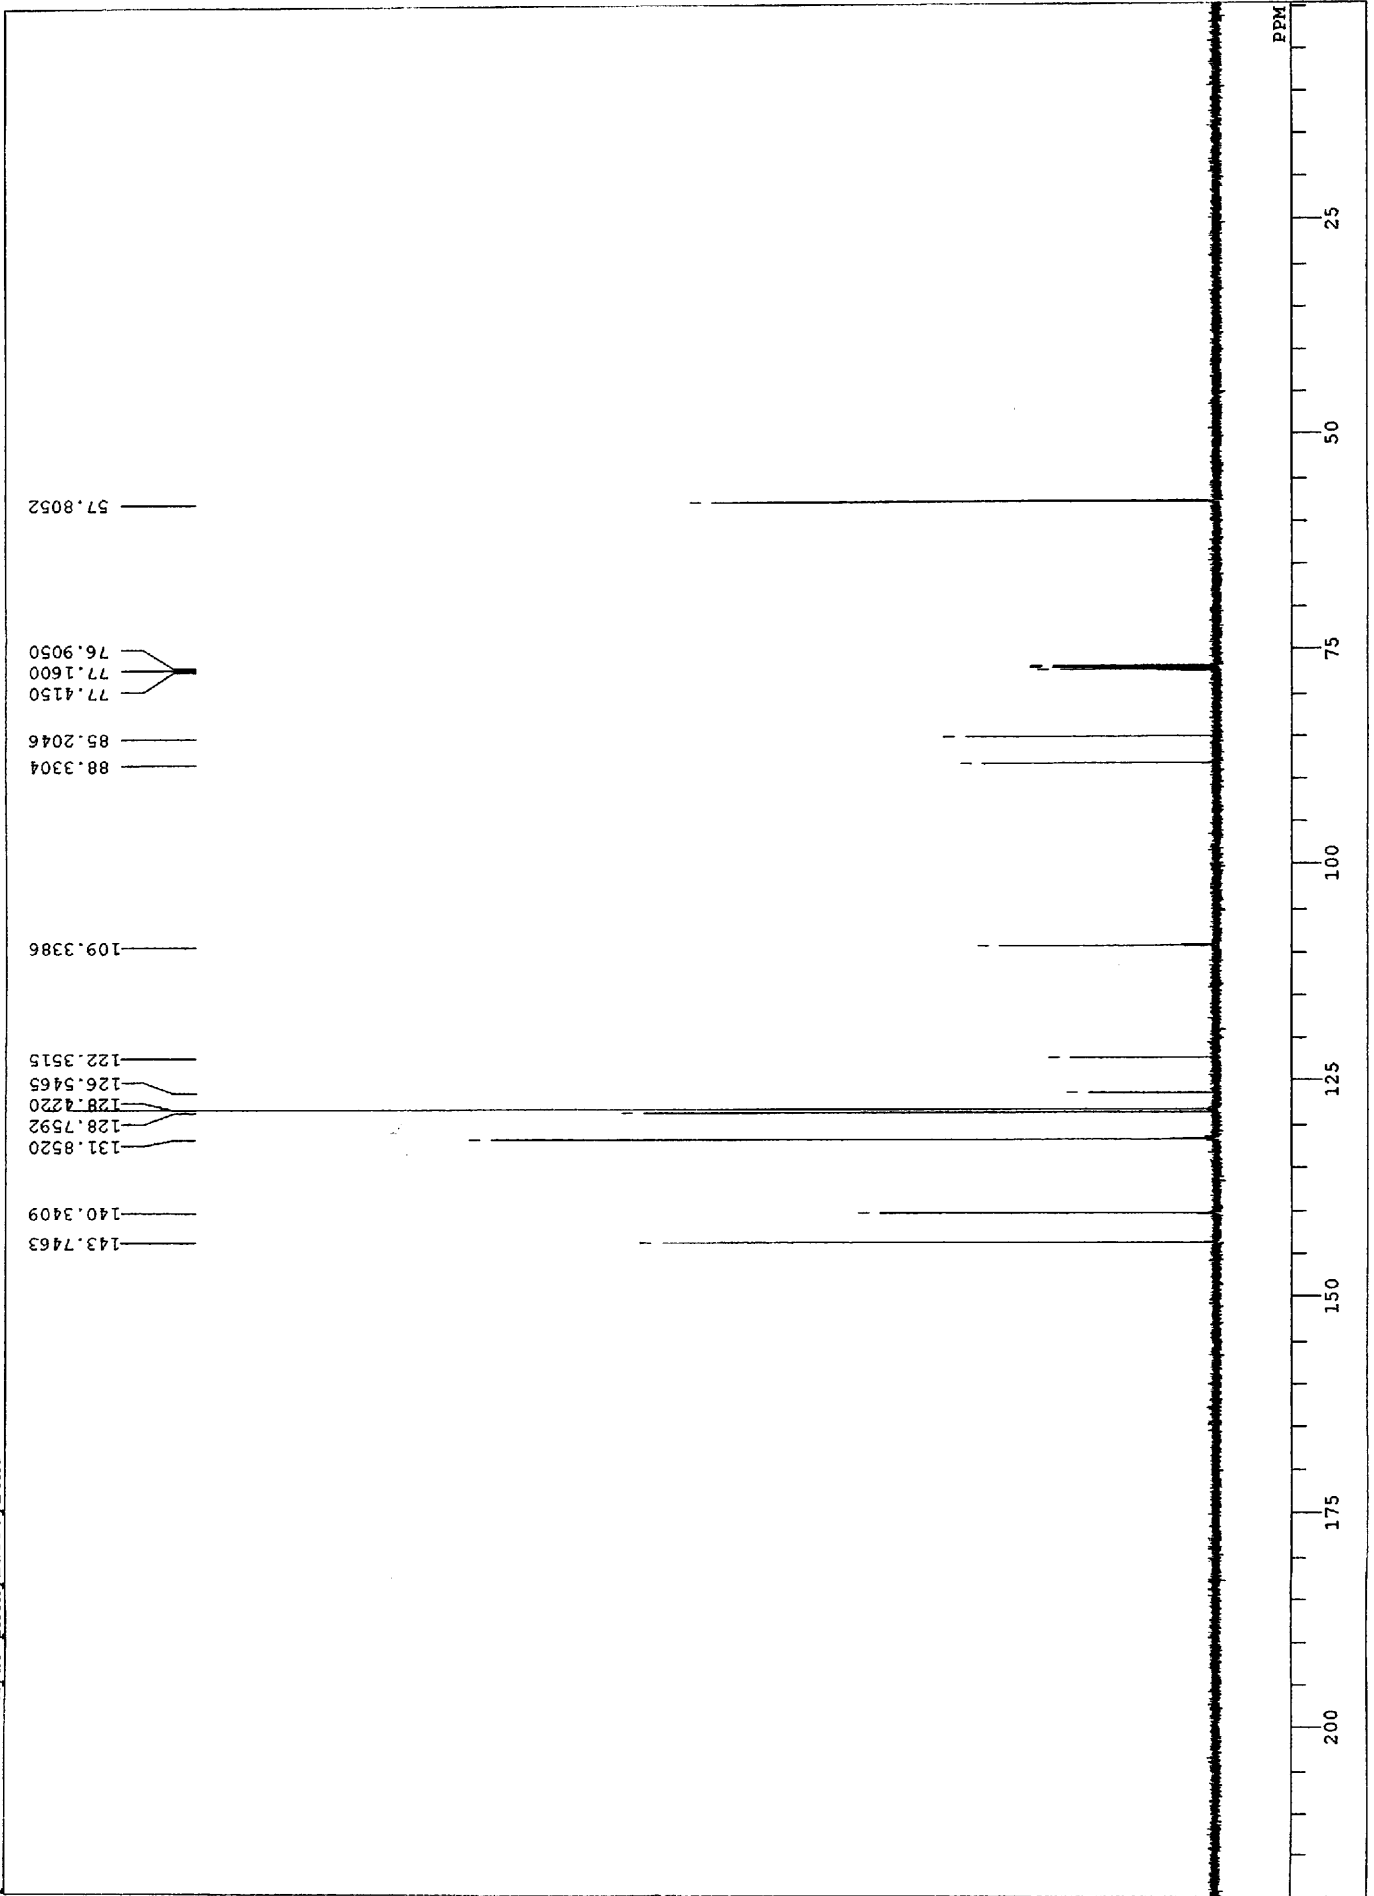



D:\050816\_04\_13C\savedata77.nmfid  
p129 3-thienylaldehyde+phenylacetylene

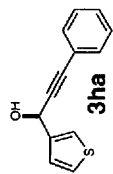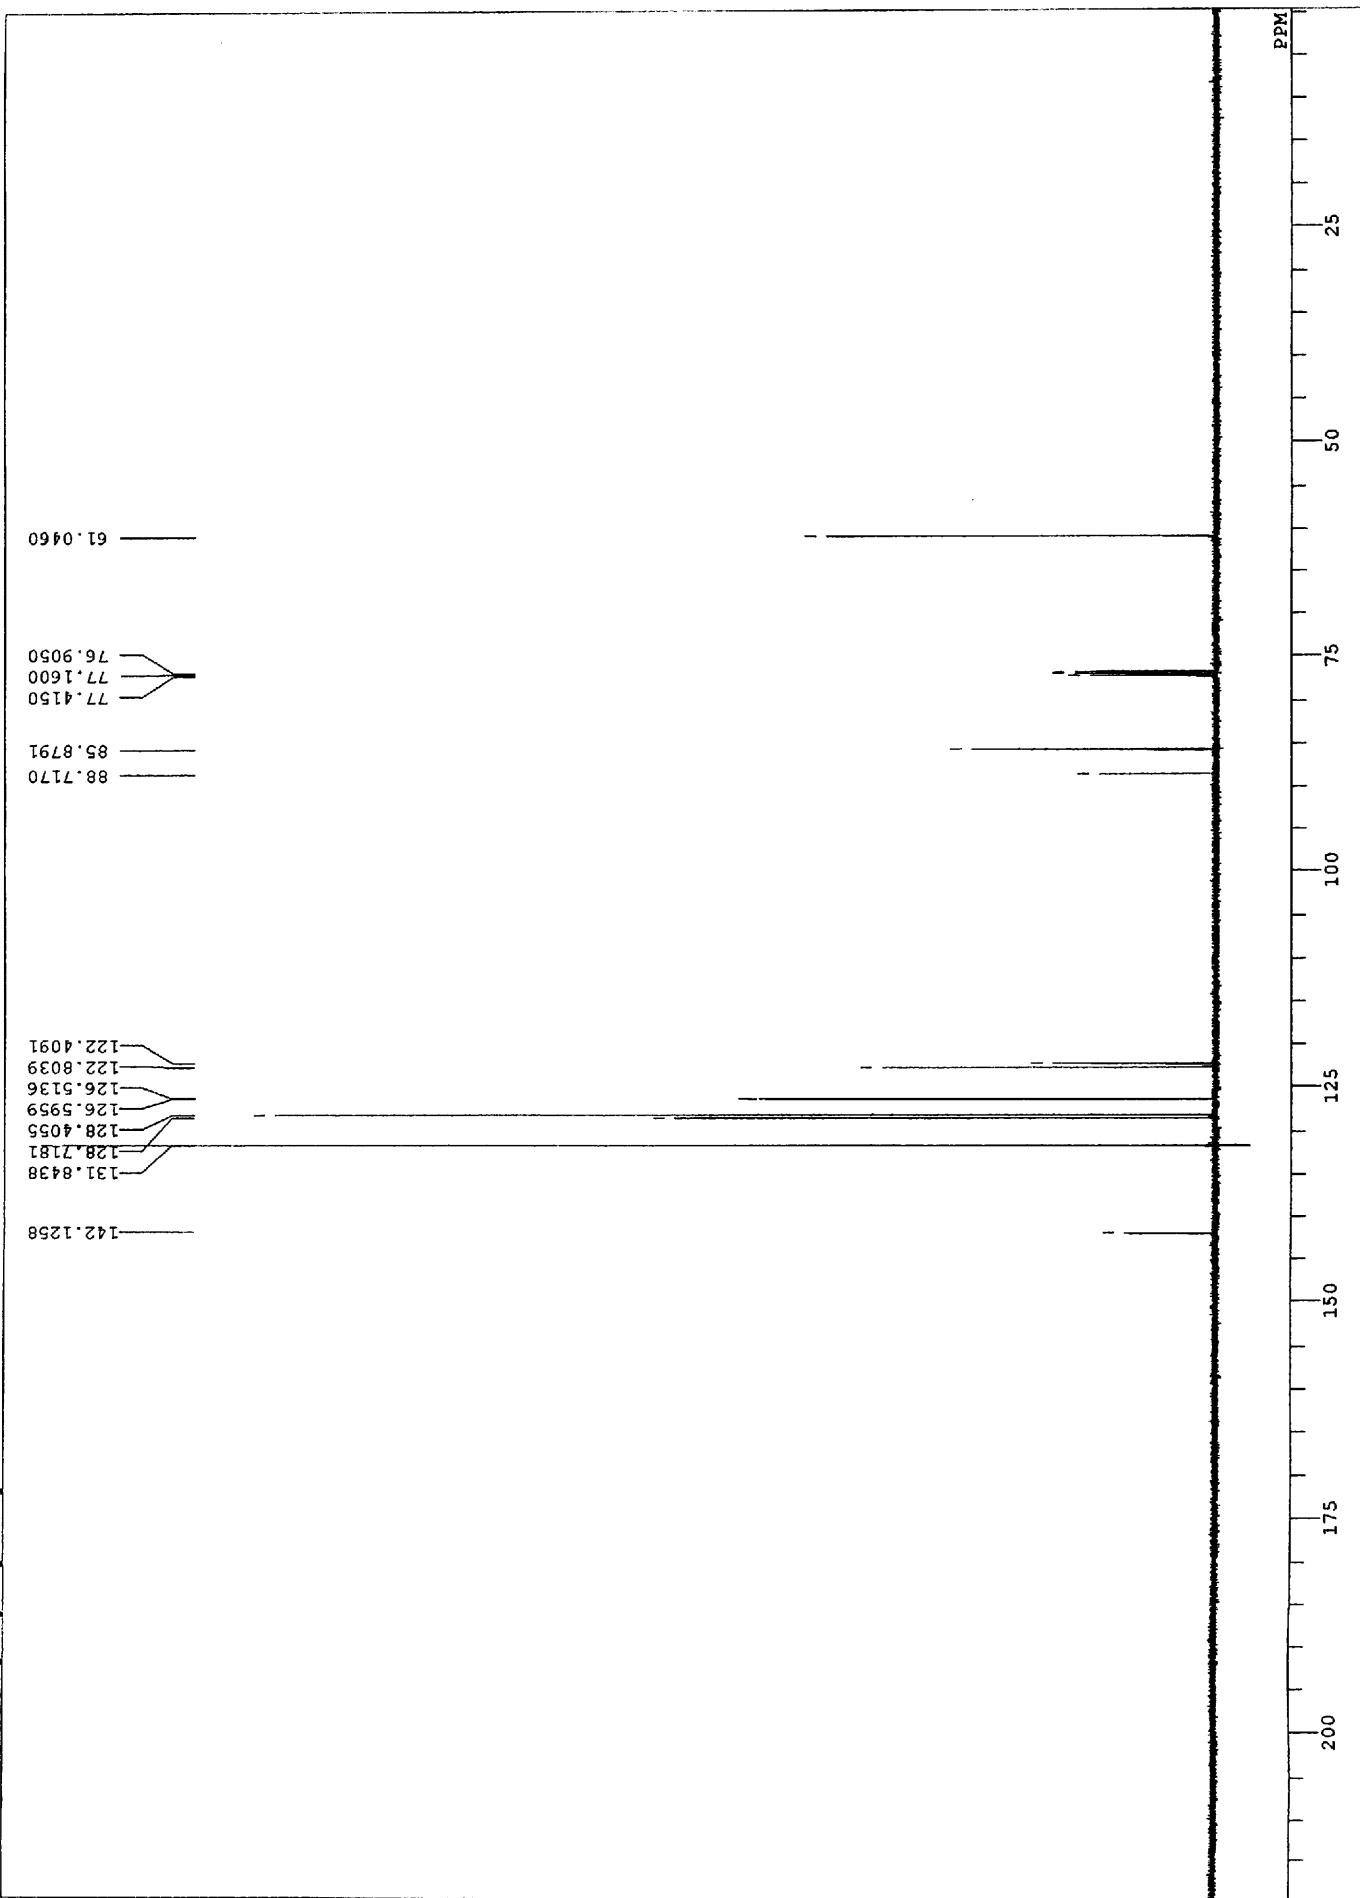

Supplement: Supplementary file 1 [file 5101444]
